# Supplementary material for: DFT investigation of the impact of inner-sphere water molecules on RE nitrate binding to internal pore and external surface of MCM-22
Source: Royal Society of Chemistry journal article supplement (doi:10.1039/d4cp03424d), 2024-12-02
Supplement: d4cp03424d1.pdf [file d4cp03424d1.pdf]

## Supporting Information

### **DFT Investigation of the Impact of Inner-Sphere Water Molecules on RE Nitrate Binding to Internal Pore and External Surface of MCM-22**

Tamalika Ash\*,<sup>1,2</sup> Yong Han,<sup>1,3</sup> James W. Evans<sup>1,3</sup> and Theresa L. Windus\*,<sup>1,4</sup>

<sup>1</sup>Ames National Laboratory, U.S. Department of Energy, Ames, Iowa 50011, USA

<sup>2</sup>Department of Aerospace Engineering, Iowa State University, Ames, Iowa 50011, USA

<sup>3</sup>Department of Physics & Astronomy, Iowa State University, Ames, Iowa 50011, USA

<sup>4</sup>Department of Chemistry, Iowa State University, Ames, Iowa 50011, USA

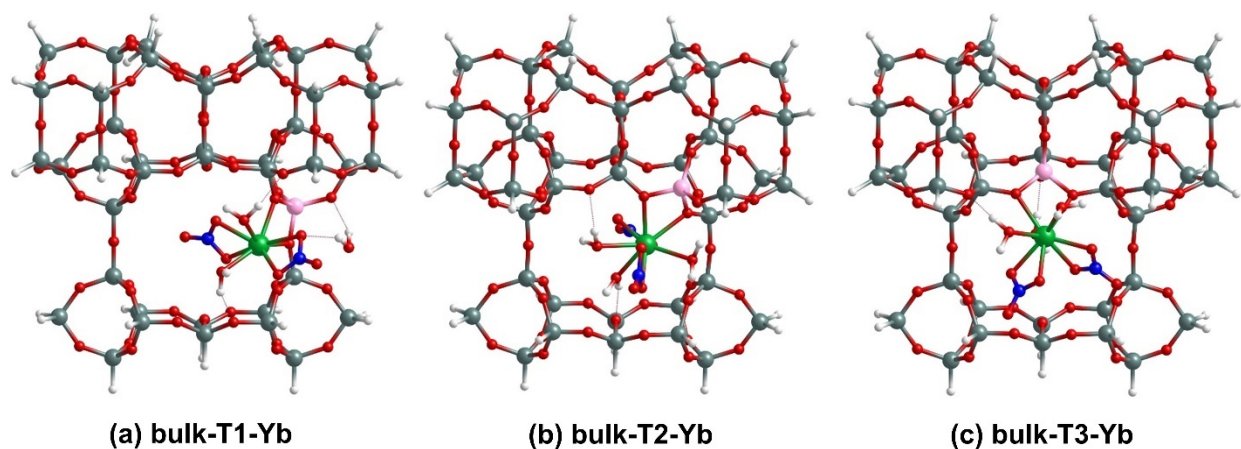

**Figure S1.** Lowest energy optimized geometries for  $[\text{Yb}(\text{NO}_3)_3(\text{H}_2\text{O})_3]$  binding to T1, T2 and T3 BASs at internal pore using cluster models.

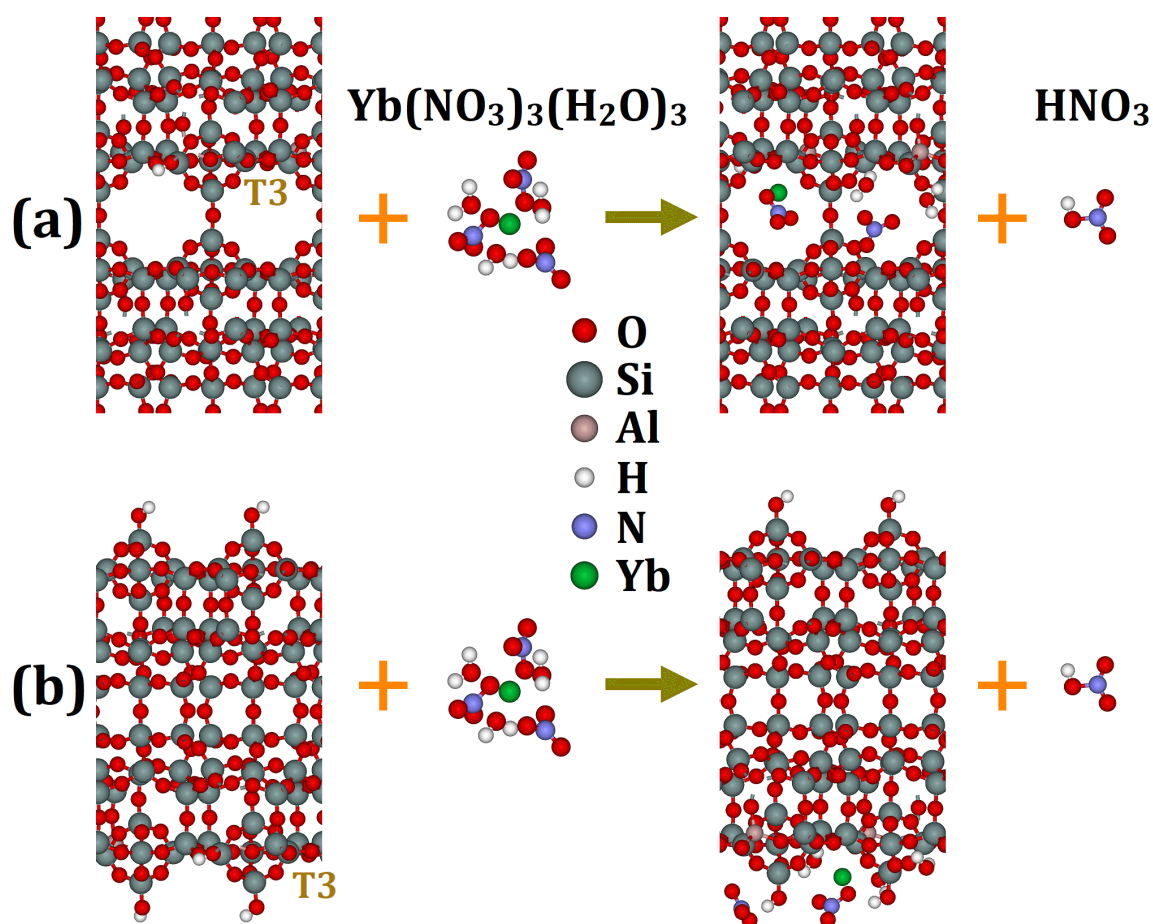

**Figure S2.** Binding of  $\text{Yb}(\text{NO}_3)_3(\text{H}_2\text{O})_3$  complexes at BASs at (a) internal and (b) external surfaces of MCM-22. The overall reaction mechanism indicating all reactants and products is shown by using plus signs and arrows. All structures are optimized from our plane-wave DFT calculations. Yb nitrate binding reactions with an Al atom at the T3 site of the MCM-22 reactant.

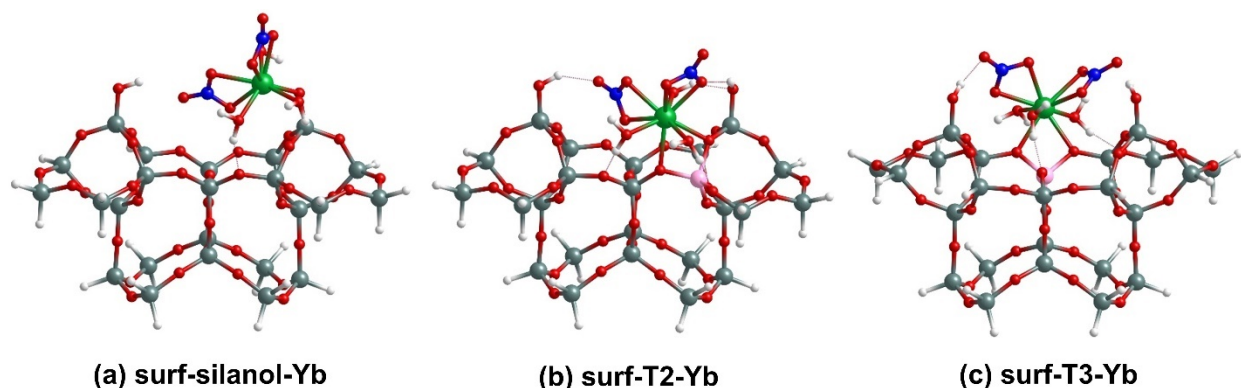

**Figure S3.** Lowest energy optimized geometries for  $[\text{Yb}(\text{NO}_3)_3(\text{H}_2\text{O})_3]$  binding to silanol site and T2, and T3 BASs at external surface using cluster models.

**Table S1.** Geometrical parameters associated with the highest binding bulk and surface structures of Nd and Yb complexes. Bond lengths are given in Å.

| X-bound MCM-22 clusters | X-Al | X-O  | X-O  |
|-------------------------|------|------|------|
| bulk-T1-Nd              | 3.34 | 2.45 | 2.61 |
| surf-T3-Nd              | 3.32 | 2.53 | 2.55 |
| bulk-T1-Yb              | 3.19 | 2.31 | 2.42 |
| surf-T2-Yb              | 3.18 | 2.37 | 2.42 |

**Table S2.** Comparison of binding energies (in eV) for  $\text{X}(\text{NO}_3)_3$  and  $[\text{X}(\text{NO}_3)_3(\text{H}_2\text{O})_n]$  at bulk-T3 and surf-T3 BASs from periodic model calculations.

|                                                              |            |            |
|--------------------------------------------------------------|------------|------------|
| $\text{X}(\text{NO}_3)_3$ at bulk-T3                         | -1.80 (Nd) | -1.61 (Yb) |
| $[\text{X}(\text{NO}_3)_3(\text{H}_2\text{O})_4]$ at bulk-T3 | -2.22 (Nd) | -1.76 (Yb) |
| $\text{X}(\text{NO}_3)_3$ at surf-T3                         | -1.41 (Nd) | -1.27 (Yb) |
| $[\text{X}(\text{NO}_3)_3(\text{H}_2\text{O})_4]$ at surf-T3 | -2.01 (Nd) | -1.61 (Yb) |

The Cartesian coordinates  $x$ ,  $y$ , and  $z$  (in Å) of all optimized geometries from DFT calculations.

$[\text{Nd}(\text{NO}_3)_3(\text{H}_2\text{O})_4]$ :

|    |              |              |              |
|----|--------------|--------------|--------------|
| Nd | 0.032947380  | 0.022288280  | -0.184684480 |
| O  | 1.266522240  | 1.982046890  | -1.062836920 |
| N  | 0.591782300  | 2.899626210  | -0.508100440 |
| O  | -0.391507430 | 2.495511700  | 0.188157200  |
| O  | 0.855406850  | 4.056100100  | -0.634905710 |
| O  | 2.161593850  | -1.219269340 | -0.253490920 |
| O  | 0.802516170  | -1.837506450 | 1.279179450  |
| N  | 1.888679390  | -2.055068240 | 0.665428910  |
| O  | -3.441756960 | -0.737797120 | 1.952467500  |
| O  | -1.471819620 | 0.124310810  | 1.786566680  |
| O  | -2.344007430 | -0.846786670 | 0.094319040  |
| N  | -2.462668640 | -0.495570230 | 1.318062990  |
| O  | 2.606448950  | -2.970097820 | 0.926494510  |

|   |              |              |              |
|---|--------------|--------------|--------------|
| O | -1.755118540 | 1.007668320  | -1.763024450 |
| O | -0.539988580 | -2.052221030 | -1.514994420 |
| O | 1.167285130  | 0.901157020  | 1.893584240  |
| O | 1.173613630  | -0.267653890 | -2.549106520 |
| H | 1.482708560  | 0.628330630  | -2.745524730 |
| H | 1.956896090  | -0.739717350 | -2.222744340 |
| H | 1.065668300  | 0.182850180  | 2.534303670  |
| H | 0.585719160  | 1.607152540  | 2.209146910  |
| H | -1.853469880 | 1.918706010  | -1.449868850 |
| H | -2.502010660 | 0.529500540  | -1.364792230 |
| H | -1.442890800 | -2.339312650 | -1.324521670 |
| H | -0.462880780 | -1.916233510 | -2.467683240 |

[Yb(NO<sub>3</sub>)<sub>3</sub>(H<sub>2</sub>O)<sub>3</sub>]:

|    |              |              |              |
|----|--------------|--------------|--------------|
| Yb | -0.099230290 | 0.032023160  | -0.071238960 |
| O  | 1.099119010  | 1.397941810  | -1.500003900 |
| N  | 0.790017820  | 2.506817570  | -0.977367490 |
| O  | 0.031947390  | 2.415263460  | 0.047664700  |
| O  | 1.165933660  | 3.554139070  | -1.400193390 |
| O  | 1.897165790  | -1.165164990 | -0.353706150 |
| O  | 0.519249940  | -1.862893570 | 1.120630420  |
| N  | 1.651247260  | -2.011187980 | 0.559093770  |
| O  | -3.331034110 | -1.183874470 | 1.878134160  |
| O  | -1.610683800 | 0.111853640  | 1.700362840  |
| O  | -2.107379110 | -1.206765190 | 0.096729660  |
| N  | -2.395195810 | -0.782879440 | 1.260897070  |
| O  | 2.411141700  | -2.876733600 | 0.863479030  |
| O  | -1.854432620 | 1.096786420  | -1.289333960 |
| O  | -0.346619640 | -1.386688620 | -1.957311650 |
| O  | 1.129579930  | 0.726783550  | 1.838260350  |
| H  | 0.799466690  | 0.264130670  | 2.619969510  |
| H  | 0.957657920  | 1.668479150  | 1.978436500  |
| H  | -2.054139940 | 1.973543410  | -0.935800670 |
| H  | -2.675670120 | 0.589231500  | -1.296609070 |
| H  | -0.900967470 | -2.154181460 | -1.761933790 |
| H  | 0.516565280  | -1.727470820 | -2.229371400 |

Internal pore cluster model:

|   |              |              |              |
|---|--------------|--------------|--------------|
| H | -2.822156840 | -8.793391720 | 0.426277410  |
| H | -5.061929110 | -4.913936560 | 0.426276250  |
| H | -2.821191410 | -8.809408860 | 4.684232690  |
| H | -5.075356400 | -4.905101820 | 4.684244970  |
| O | 2.038483880  | -3.416932390 | -5.220439010 |
| O | -0.633038290 | -3.414958190 | -5.226225240 |
| O | 0.704434400  | -5.724294840 | -5.198247740 |
| O | 3.035409810  | -1.306006320 | -6.539326900 |
| H | -2.790885790 | -3.537091400 | -6.559402120 |
| H | 1.897767730  | -7.515026880 | -6.559402230 |
| H | -0.494180280 | -7.515026880 | -6.559402230 |
| O | -1.631561710 | -1.306019430 | -6.540608460 |
| H | 4.194373240  | -3.537091400 | -6.559402120 |

|    |              |              |              |
|----|--------------|--------------|--------------|
| O  | 2.033392450  | -3.371079950 | -7.903326100 |
| O  | -0.630194140 | -3.371442090 | -7.904709570 |
| O  | 0.702403990  | -5.717331610 | -7.900397200 |
| H  | 0.701793720  | -4.172572010 | -9.893425710 |
| Si | 0.699612280  | -4.175867780 | -4.680297810 |
| Si | 2.856193720  | -2.928692010 | -6.554325710 |
| Si | -1.452706280 | -2.928692010 | -6.554325710 |
| Si | 0.701793720  | -6.660322010 | -6.554325710 |
| Si | 0.701793720  | -4.172572010 | -8.423425710 |
| O  | 0.674201290  | -4.146666630 | -3.079908030 |
| O  | 2.016635110  | -3.457713580 | -0.934472790 |
| O  | -0.655610280 | -3.432061930 | -0.910490820 |
| O  | 0.659670760  | -5.755013820 | -1.000023360 |
| O  | 3.029809450  | -1.305181820 | 0.311720660  |
| O  | -2.972656200 | -3.542878900 | 0.410977620  |
| H  | 1.897767730  | -7.515026880 | 0.369850810  |
| O  | -0.586395330 | -7.661689850 | 0.420769690  |
| O  | -1.637566120 | -1.296782930 | 0.342949810  |
| H  | 4.194373240  | -3.537091400 | 0.369850710  |
| O  | 2.016580410  | -3.328529390 | 1.734180800  |
| O  | -0.658863740 | -3.345433530 | 1.756222870  |
| O  | 0.680840720  | -5.655774170 | 1.675697170  |
| O  | 0.697357100  | -4.174139150 | 3.872387300  |
| O  | -2.179920600 | -7.641386450 | 2.571744090  |
| O  | -3.731885400 | -4.927220350 | 2.571922610  |
| O  | -2.828934940 | -6.210826850 | 0.433679560  |
| O  | -2.869729690 | -6.234470340 | 4.721526200  |
| O  | 3.039866200  | -1.323431820 | 4.679660370  |
| O  | -2.934275330 | -3.557722380 | 4.687357100  |
| H  | 1.892493360  | -7.579591290 | 4.814913270  |
| O  | -0.583603670 | -7.627974250 | 4.675172490  |
| O  | -1.585794050 | -1.322728420 | 4.715885980  |
| H  | 4.247676960  | -3.500233910 | 4.814916200  |
| O  | 1.999000360  | -3.401843710 | 6.068726390  |
| O  | -0.626009920 | -3.433977640 | 6.070138730  |
| O  | 0.702171020  | -5.683864200 | 6.072452060  |
| H  | 4.006170520  | -2.264706550 | 6.884849580  |
| H  | -2.602683070 | -2.264706550 | 6.884849580  |
| H  | 0.701793720  | -7.988200490 | 6.884848860  |
| Si | 0.666803140  | -4.193995880 | -1.481579010 |
| Si | 2.856193720  | -2.928692010 | 0.364774290  |
| Si | -1.479832180 | -2.910016500 | 0.396004810  |
| Si | 0.701793720  | -6.660322010 | 0.364774290  |
| Si | -2.132006280 | -7.609422010 | 0.958074290  |
| Si | -3.691506280 | -4.908272010 | 0.958074290  |
| Si | 0.688131010  | -4.128270300 | 2.262248720  |
| Si | 0.694868400  | -4.171547740 | 5.504990440  |
| Si | -2.131706280 | -7.609892010 | 4.187574290  |
| Si | -3.691806280 | -4.907802010 | 4.187574290  |
| Si | 3.368793720  | -2.632752010 | 5.612374290  |
| Si | -1.965306280 | -2.632752010 | 5.612374290  |

|    |              |              |              |
|----|--------------|--------------|--------------|
| Si | 0.701793720  | -7.252192010 | 5.612374290  |
| O  | -0.633066760 | 3.414986820  | -5.226215180 |
| O  | 2.038510810  | 3.416962710  | -5.220429220 |
| O  | 0.704433170  | 5.724270590  | -5.198256710 |
| O  | -1.631561760 | 1.306036530  | -6.540621300 |
| H  | 4.194390310  | 3.537069820  | -6.559402190 |
| H  | -0.494197430 | 7.514988850  | -6.559402300 |
| H  | 1.897784880  | 7.514988850  | -6.559402300 |
| O  | 3.035409870  | 1.306023460  | -6.539338810 |
| H  | -2.790902870 | 3.537069820  | -6.559402190 |
| O  | -0.630207570 | 3.371506530  | -7.904699730 |
| O  | 2.033402150  | 3.371139320  | -7.903315720 |
| O  | 0.702403130  | 5.717369900  | -7.900426390 |
| H  | 0.701793720  | 4.172607990  | -9.893425710 |
| H  | 2.314873180  | 0.000007990  | -8.616648930 |
| H  | -0.911285740 | 0.000007990  | -8.616648930 |
| O  | 0.702103490  | 0.000006740  | -6.638892910 |
| Si | 0.699610650  | 4.175847280  | -4.680291050 |
| Si | -1.452706280 | 2.928707990  | -6.554325710 |
| Si | 2.856193720  | 2.928707990  | -6.554325710 |
| Si | 0.701793720  | 6.660307990  | -6.554325710 |
| Si | 2.261293720  | 0.000007990  | -7.147625710 |
| Si | -0.857706280 | 0.000007990  | -7.147625710 |
| Si | 0.701793720  | 4.172607990  | -8.423425710 |
| O  | 0.674194760  | 4.146661350  | -3.079902900 |
| O  | -0.655620800 | 3.432077430  | -0.910476320 |
| O  | 2.016713080  | 3.457850840  | -0.934475830 |
| O  | 0.659634260  | 5.755016850  | -1.000034950 |
| O  | -1.637589120 | 1.296791740  | 0.342966880  |
| H  | 4.194390310  | 3.537069820  | 0.369850770  |
| O  | -0.586388810 | 7.661682870  | 0.420789650  |
| H  | -5.061929310 | 4.913918250  | 0.426276170  |
| H  | 1.897784880  | 7.514988850  | 0.369850890  |
| O  | 3.029811640  | 1.305198020  | 0.311705870  |
| O  | -2.972661740 | 3.542904260  | 0.410979240  |
| H  | -2.822167100 | 8.793368160  | 0.426269500  |
| O  | -0.658901390 | 3.345465800  | 1.756243200  |
| O  | 2.016597340  | 3.328565150  | 1.734179050  |
| O  | 0.680850740  | 5.655761730  | 1.675692990  |
| O  | 0.697362100  | 4.174140050  | 3.872387040  |
| O  | -0.845249190 | -0.000002200 | 2.545343220  |
| O  | -2.179935100 | 7.641370040  | 2.571743410  |
| O  | 2.274327490  | 0.000009630  | 2.522327220  |
| O  | -3.731888170 | 4.927270220  | 2.571922340  |
| O  | 0.697276600  | 0.000002160  | 0.391384510  |
| O  | -2.828927670 | 6.210831000  | 0.433644290  |
| O  | 0.725190570  | 0.000007230  | 4.689802930  |
| O  | -2.869849650 | 6.234551150  | 4.721535740  |
| O  | -1.585879330 | 1.322627600  | 4.715942610  |
| H  | 4.247657740  | 3.500225390  | 4.814933640  |
| O  | -0.583619800 | 7.628028230  | 4.675210880  |

|    |              |              |              |
|----|--------------|--------------|--------------|
| H  | -5.075356350 | 4.905080530  | 4.684244950  |
| H  | 1.892504820  | 7.579546880  | 4.814905590  |
| O  | 3.039908450  | 1.323366220  | 4.679688580  |
| O  | -2.934319440 | 3.557728370  | 4.687437630  |
| H  | -2.821194890 | 8.809421810  | 4.684235200  |
| O  | -0.625989380 | 3.433906900  | 6.070134710  |
| O  | 1.999022540  | 3.401857320  | 6.068707080  |
| O  | 0.702130810  | 5.683861880  | 6.072434980  |
| H  | -2.602689010 | 2.264713790  | 6.884861430  |
| H  | 4.006176450  | 2.264713790  | 6.884861430  |
| H  | 0.701793720  | 7.988195980  | 6.884860710  |
| Si | 0.666795790  | 4.193989260  | -1.481574210 |
| Si | -1.479842920 | 2.910025590  | 0.396017190  |
| Si | 2.856193720  | 2.928707990  | 0.364774290  |
| Si | 0.701793720  | 6.660307990  | 0.364774290  |
| Si | -0.851393660 | 0.000007650  | 0.924373600  |
| Si | -2.132006280 | 7.609407990  | 0.958074290  |
| Si | 2.253520120  | 0.000014140  | 0.900559310  |
| Si | -3.691506280 | 4.908307990  | 0.958074290  |
| Si | 0.688120910  | 4.128259760  | 2.262252840  |
| Si | 0.694861570  | 4.171531290  | 5.504989680  |
| Si | -0.827211050 | -0.000013490 | 4.167963080  |
| Si | -2.131706280 | 7.609907990  | 4.187574290  |
| Si | 2.270120840  | -0.000014560 | 4.146221850  |
| Si | -3.691806280 | 4.907807990  | 4.187574290  |
| Si | -1.965306280 | 2.632707990  | 5.612374290  |
| Si | 3.368793720  | 2.632707990  | 5.612374290  |
| Si | 0.701793720  | 7.252207990  | 5.612374290  |

External surface cluster model:

|   |              |              |             |
|---|--------------|--------------|-------------|
| O | -2.526831580 | 2.411661790  | 2.992989470 |
| O | -5.207859580 | 2.381375780  | 2.888023200 |
| O | -3.868689140 | 0.099616850  | 2.872070510 |
| O | 2.024150250  | -3.307240940 | 2.871886900 |
| O | 4.669243370  | -3.317114940 | 2.889551160 |
| O | 3.359580560  | -0.984315540 | 2.993078030 |
| O | -1.537597400 | 4.472213970  | 1.583743760 |
| H | -7.383577460 | 2.241526570  | 1.550084960 |
| O | -2.574031770 | -1.848454950 | 1.572803370 |
| H | 1.039495460  | -5.273485860 | 1.550084960 |
| O | 6.995356470  | -3.180292270 | 1.552652030 |
| O | 2.014352150  | 0.890023760  | 1.647921320 |
| H | -5.086922240 | -1.736396950 | 1.550084960 |
| O | -6.251098940 | 4.468112230  | 1.554218800 |
| O | -0.233474280 | 2.191808230  | 1.644152830 |
| O | 4.641824180  | 0.906315820  | 1.584220010 |
| H | 5.632805890  | -5.273485870 | 1.550084960 |
| O | -0.312822350 | -3.151191300 | 1.576519660 |
| O | -2.535735130 | 2.354948940  | 0.307860330 |
| O | -5.197670890 | 2.402058810  | 0.206677630 |
| O | -3.874479090 | 0.050342780  | 0.194021190 |

|    |              |              |              |
|----|--------------|--------------|--------------|
| O  | 1.978422160  | -3.326516520 | 0.194127890  |
| O  | 4.676637760  | -3.301038030 | 0.207771960  |
| O  | 3.308543210  | -1.017139570 | 0.307450700  |
| O  | -3.792394600 | 1.620195360  | -1.911356700 |
| O  | 3.299067090  | -2.473638990 | -1.911296620 |
| O  | -1.046755460 | -1.816188040 | -0.616667840 |
| O  | 0.521981400  | 0.900129070  | -0.586416030 |
| O  | -0.276773080 | -0.475700470 | 1.536720600  |
| O  | -0.266208130 | -0.457881980 | -2.752648930 |
| H  | -1.535729000 | 4.340777690  | -2.894991580 |
| O  | -2.571761660 | -1.812584850 | -2.778334810 |
| H  | 0.980939740  | -5.301234120 | -2.894991580 |
| O  | 2.037667710  | 0.879970920  | -2.755893220 |
| H  | -5.081675070 | -1.800981830 | -2.894991580 |
| O  | -0.256318250 | 2.206115380  | -2.754517250 |
| H  | 4.526886460  | 0.840525020  | -2.894991580 |
| O  | -0.284137360 | -3.132499610 | -2.779630720 |
| O  | -2.581811420 | 2.356355910  | -4.152371490 |
| H  | -5.086849990 | 2.296511730  | -4.046900160 |
| O  | -3.922110510 | 0.097909230  | -4.133818390 |
| O  | 2.045852150  | -3.347785990 | -4.133657620 |
| H  | 4.532061020  | -3.256969060 | -4.046900270 |
| O  | 3.332960910  | -1.057706250 | -4.152565890 |
| H  | -0.586524160 | 3.513858200  | -4.964882460 |
| H  | -3.890939770 | -2.209557850 | -4.964882310 |
| H  | 0.031734870  | -4.474315110 | -4.964882310 |
| H  | 3.336150760  | 1.249100780  | -4.964882460 |
| Si | -3.885159210 | 1.621857120  | 3.485128600  |
| Si | 3.345409790  | -2.555514540 | 3.485602140  |
| Si | -1.716261940 | 2.859497100  | 1.642884580  |
| Si | -6.045400190 | 2.849931220  | 1.555122120  |
| Si | -3.890939780 | -0.881703680 | 1.555122120  |
| Si | 1.181690310  | -3.810388030 | 1.555122120  |
| Si | 5.490611150  | -3.810388030 | 1.555122120  |
| Si | 3.336085940  | -0.057125080 | 1.643741720  |
| Si | -1.049922300 | -1.818313430 | 1.003487450  |
| Si | 0.505683400  | 0.875010370  | 1.036702890  |
| Si | -3.858911440 | 1.608850200  | -0.301928930 |
| Si | 3.321749420  | -2.536238480 | -0.301933170 |
| Si | -3.890939780 | 1.606052430  | -3.542951020 |
| Si | 3.336150960  | -2.566509610 | -3.542951020 |
| Si | -1.042631130 | -1.805314020 | -2.239263350 |
| Si | 0.509090410  | 0.882458630  | -2.214133430 |
| Si | -1.223906890 | 3.145865570  | -3.692394870 |
| Si | -3.890939770 | -1.473571630 | -3.692394870 |
| Si | 0.669117630  | -4.106322000 | -3.692394870 |
| Si | 3.336151160  | 0.513114830  | -3.692394870 |
| O  | 3.328942330  | -2.617026180 | 5.112837290  |
| O  | -3.946366490 | 1.601015970  | 5.112246550  |
| H  | -6.130747010 | 6.968250560  | 1.493657950  |
| H  | -1.651132620 | 6.968250600  | 1.493657970  |



|    |              |              |              |
|----|--------------|--------------|--------------|
| H  | -2.277873830 | 5.778615570  | -0.507210300 |
| H  | -5.504005720 | 5.778615570  | -0.507210300 |
| O  | -3.890851780 | 5.743778970  | 1.477641030  |
| Si | -2.331434090 | 5.778615570  | 0.961813630  |
| Si | -5.450445460 | 5.778615570  | 0.961813630  |
| H  | 6.860046570  | 2.054319010  | 1.493657970  |
| H  | 9.099853730  | -1.825140870 | 1.493657950  |
| H  | 6.143163010  | 0.916727680  | -0.507210300 |
| H  | 7.756228960  | -1.877184490 | -0.507210300 |
| O  | 6.918332080  | -0.498275040 | 1.478213160  |
| Si | 6.169943140  | 0.870343140  | 0.961813630  |
| Si | 7.729448830  | -1.830799950 | 0.961813630  |
| H  | -3.148012200 | 1.883665940  | 5.566939070  |
| H  | 3.360570630  | -1.769448220 | 5.564954790  |

bulk-T1-Nd:

|    |              |              |              |
|----|--------------|--------------|--------------|
| H  | -2.545855100 | -8.501420080 | 0.778409300  |
| H  | -4.785627370 | -4.621964920 | 0.778408140  |
| H  | -2.544889670 | -8.517437220 | 5.036364580  |
| H  | -4.799054660 | -4.613130180 | 5.036376860  |
| O  | 2.351037110  | -3.150934300 | -4.842244100 |
| O  | -0.290669100 | -2.940842790 | -4.895620660 |
| O  | 0.955041680  | -5.384817970 | -4.869650080 |
| O  | 3.311162850  | -1.016084160 | -6.186531010 |
| H  | -2.514584050 | -3.245119760 | -6.207270230 |
| H  | 2.174069470  | -7.223055240 | -6.207270340 |
| H  | -0.217878540 | -7.223055240 | -6.207270340 |
| O  | -1.447783490 | -1.009068050 | -6.256165410 |
| H  | 4.470674980  | -3.245119760 | -6.207270230 |
| O  | 2.283571540  | -3.058817870 | -7.537438300 |
| O  | -0.376989680 | -3.112008730 | -7.545747920 |
| O  | 0.991569620  | -5.428067490 | -7.554014890 |
| H  | 0.978095460  | -3.880600370 | -9.541293820 |
| Si | 0.975199890  | -3.848949980 | -4.323930800 |
| Si | 3.132495460  | -2.636720370 | -6.202193820 |
| Si | -1.176404540 | -2.636720370 | -6.202193820 |
| Si | 0.978095460  | -6.368350370 | -6.202193820 |
| Si | 0.978095460  | -3.880600370 | -8.071293820 |
| O  | 0.604123090  | -3.696281180 | -2.772752370 |
| O  | 2.275268400  | -3.144602930 | -0.535746760 |
| O  | -0.622909990 | -3.055040650 | -0.557932660 |
| O  | 0.752352680  | -5.586705120 | -0.686441180 |
| O  | 3.344559990  | -1.007177730 | 0.697093390  |
| O  | -2.763788380 | -3.147135750 | 0.976218260  |
| H  | 2.174069470  | -7.223055240 | 0.721982700  |
| O  | -0.285062480 | -7.406465180 | 0.892342870  |
| O  | -1.444240930 | -0.972249690 | 0.939351890  |
| H  | 4.470674980  | -3.245119760 | 0.721982600  |
| O  | 2.345184620  | -2.992242240 | 2.146340980  |
| O  | -0.324755840 | -3.082155430 | 2.129227680  |
| O  | 1.039800000  | -5.336654310 | 1.999046040  |

|    |              |              |              |
|----|--------------|--------------|--------------|
| O  | 0.996308090  | -3.926189400 | 4.242330340  |
| O  | -1.990963330 | -7.331934720 | 2.923407690  |
| O  | -3.480525620 | -4.735557100 | 2.925316750  |
| O  | -2.479352890 | -5.869356370 | 0.745773330  |
| O  | -2.574082730 | -5.931016840 | 5.095764770  |
| O  | 3.332584620  | -1.032084350 | 5.027966090  |
| O  | -2.663601130 | -3.248569240 | 5.014019040  |
| H  | 2.168795100  | -7.287619650 | 5.167045160  |
| O  | -0.296470440 | -7.328805060 | 4.999890000  |
| O  | -1.276980680 | -1.048231110 | 5.049780750  |
| H  | 4.523978700  | -3.208262270 | 5.167048090  |
| O  | 2.266997490  | -3.096080290 | 6.429083240  |
| O  | -0.362767320 | -3.164156190 | 6.420800890  |
| O  | 0.983439940  | -5.399014240 | 6.452186650  |
| H  | 4.282472260  | -1.972734910 | 7.236981470  |
| H  | -2.326381330 | -1.972734910 | 7.236981470  |
| H  | 0.978095460  | -7.696228850 | 7.236980750  |
| Al | 0.859624890  | -3.906005620 | -1.081428330 |
| Si | 3.132495460  | -2.636720370 | 0.716906180  |
| Si | -1.237098370 | -2.578044360 | 0.883418700  |
| Si | 0.978095460  | -6.368350370 | 0.716906180  |
| Si | -1.855704540 | -7.317450370 | 1.310206180  |
| Si | -3.415204540 | -4.616300370 | 1.310206180  |
| Si | 1.042179100  | -3.836288260 | 2.635686970  |
| Si | 0.973674130  | -3.890034850 | 5.873266030  |
| Si | -1.855404540 | -7.317920370 | 4.539706180  |
| Si | -3.415504540 | -4.615830370 | 4.539706180  |
| Si | 3.645095460  | -2.340780370 | 5.964506180  |
| Si | -1.689004540 | -2.340780370 | 5.964506180  |
| Si | 0.978095460  | -6.960220370 | 5.964506180  |
| O  | -0.364137430 | 3.712625920  | -4.878877540 |
| O  | 2.311096870  | 3.707395930  | -4.872752720 |
| O  | 0.980579130  | 6.008420970  | -4.854787730 |
| O  | -1.366213060 | 1.585409130  | -6.168600590 |
| H  | 4.470692050  | 3.829041460  | -6.207270300 |
| H  | -0.217895690 | 7.806960490  | -6.207270410 |
| H  | 2.174086620  | 7.806960490  | -6.207270410 |
| O  | 3.298880000  | 1.597233270  | -6.186020020 |
| H  | -2.514601130 | 3.829041460  | -6.207270300 |
| O  | -0.346412540 | 3.636903410  | -7.555788460 |
| O  | 2.313788300  | 3.668073410  | -7.553723800 |
| O  | 0.961143320  | 6.008080680  | -7.550479810 |
| H  | 0.978095460  | 4.464579630  | -9.541293820 |
| H  | 2.591174920  | 0.291979630  | -8.264517040 |
| H  | -0.634984000 | 0.291979630  | -8.264517040 |
| O  | 0.970821040  | 0.244628440  | -6.308242950 |
| Si | 0.973972120  | 4.461561580  | -4.323451310 |
| Si | -1.176404540 | 3.220679630  | -6.202193820 |
| Si | 3.132495460  | 3.220679630  | -6.202193820 |
| Si | 0.978095460  | 6.952279630  | -6.202193820 |
| Si | 2.537595460  | 0.291979630  | -6.795493820 |

|    |              |             |              |
|----|--------------|-------------|--------------|
| Si | -0.581404540 | 0.291979630 | -6.795493820 |
| Si | 0.978095460  | 4.464579630 | -8.071293820 |
| O  | 0.943804560  | 4.462275410 | -2.727548160 |
| O  | -0.389497800 | 3.734583080 | -0.553291320 |
| O  | 2.295707260  | 3.734993390 | -0.590817840 |
| O  | 0.947008180  | 6.030473720 | -0.633565180 |
| O  | -1.358358690 | 1.599328650 | 0.734504650  |
| H  | 4.470692050  | 3.829041460 | 0.721982660  |
| O  | -0.313944890 | 7.952333060 | 0.761581340  |
| H  | -4.785627570 | 5.205889890 | 0.778408060  |
| H  | 2.174086620  | 7.806960490 | 0.721982780  |
| O  | 3.287106150  | 1.598236510 | 0.687134320  |
| O  | -2.703561280 | 3.830437050 | 0.765983170  |
| H  | -2.545865360 | 9.085339800 | 0.778401390  |
| O  | -0.387254550 | 3.666993890 | 2.113084820  |
| O  | 2.290907030  | 3.647091620 | 2.077491750  |
| O  | 0.953365350  | 5.973446140 | 2.047262590  |
| O  | 0.981223020  | 4.472004110 | 4.227443000  |
| O  | -0.464764840 | 0.398628330 | 2.947227540  |
| O  | -1.901698850 | 7.934945820 | 2.923804440  |
| O  | 2.517742310  | 0.302983630 | 2.891988730  |
| O  | -3.464492430 | 5.225662860 | 2.923938760  |
| O  | 0.975865120  | 0.231652300 | 0.744126320  |
| O  | -2.553505490 | 6.502300270 | 0.786259010  |
| O  | 1.027219000  | 0.291186410 | 5.118419210  |
| O  | -2.592817010 | 6.525619850 | 5.073763360  |
| O  | -1.316713270 | 1.588045810 | 5.116774360  |
| H  | 4.523959480  | 3.792197030 | 5.167065530  |
| O  | -0.308699370 | 7.919146550 | 5.029665880  |
| H  | -4.799054610 | 5.197052170 | 5.036376840  |
| H  | 2.168806560  | 7.871518520 | 5.167037480  |
| O  | 3.333477670  | 1.615486580 | 5.030242160  |
| O  | -2.654481680 | 3.843636260 | 5.025647270  |
| H  | -2.544893150 | 9.101393450 | 5.036367090  |
| O  | -0.353420470 | 3.734139700 | 6.415788900  |
| O  | 2.272260580  | 3.688336470 | 6.422768940  |
| O  | 0.983648390  | 5.977345070 | 6.430141870  |
| H  | -2.326387270 | 2.556685430 | 7.236993320  |
| H  | 4.282478190  | 2.556685430 | 7.236993320  |
| H  | 0.978095460  | 8.280167620 | 7.236992600  |
| Si | 0.944274560  | 4.470383670 | -1.128982290 |
| Si | -1.201598790 | 3.213928410 | 0.756075880  |
| Si | 3.132495460  | 3.220679630 | 0.716906180  |
| Si | 0.978095460  | 6.952279630 | 0.716906180  |
| Si | -0.543890300 | 0.326627040 | 1.329591700  |
| Si | -1.855704540 | 7.901379630 | 1.310206180  |
| Si | 2.533828770  | 0.275444280 | 1.267185150  |
| Si | -3.415204540 | 5.200279630 | 1.310206180  |
| Si | 0.966168300  | 4.440199690 | 2.617135960  |
| Si | 0.973425400  | 4.466142940 | 5.858567670  |
| Si | -0.512695580 | 0.298164590 | 4.561965410  |

|    |              |              |              |
|----|--------------|--------------|--------------|
| Si | -1.855404540 | 7.901879630  | 4.539706180  |
| Si | 2.553073840  | 0.292227060  | 4.513238920  |
| Si | -3.415504540 | 5.199779630  | 4.539706180  |
| Si | -1.689004540 | 2.924679630  | 5.964506180  |
| Si | 3.645095460  | 2.924679630  | 5.964506180  |
| Si | 0.978095460  | 7.544179630  | 5.964506180  |
| O  | -0.129485000 | -0.663399910 | -3.597241340 |
| O  | 0.342648030  | 1.196331450  | -2.605638010 |
| O  | -0.895102010 | -0.293511360 | -1.650692580 |
| N  | -0.200819140 | 0.130652300  | -2.619994700 |
| H  | -2.505147410 | -0.471621120 | -4.836946500 |
| O  | -2.884423140 | -0.713255990 | -3.972575360 |
| H  | -3.811539310 | -0.948378110 | -4.107292520 |
| O  | -3.328648150 | -1.336656790 | -1.131326830 |
| H  | -2.911937660 | -0.533655210 | -0.781033080 |
| H  | -3.532510140 | -1.877660900 | -0.349597350 |
| Nd | -1.676704010 | -2.438737280 | -2.680390640 |
| O  | -4.007140000 | -3.093198140 | -3.384387930 |
| N  | -4.268093330 | -3.852919190 | -2.406394530 |
| O  | -3.320282390 | -4.015487900 | -1.583840480 |
| O  | -5.329437760 | -4.388418670 | -2.272501270 |
| O  | -1.856392270 | -4.769651970 | -3.832184350 |
| H  | -2.716762040 | -4.922292470 | -4.236927060 |
| H  | -1.738537080 | -5.499445340 | -3.144803850 |
| O  | -1.566556280 | -6.430549720 | -1.913322430 |
| H  | -0.659175240 | -6.320832290 | -1.563634320 |
| H  | -2.119883260 | -6.029862760 | -1.221754570 |

bulk-T2-Nd:

|    |              |              |              |
|----|--------------|--------------|--------------|
| H  | -2.638198280 | -8.659538610 | 0.752682720  |
| H  | -4.877970550 | -4.780083450 | 0.752681560  |
| H  | -2.637232850 | -8.675555750 | 5.010638000  |
| H  | -4.891397840 | -4.771248710 | 5.010650280  |
| O  | 2.262733400  | -3.348578550 | -4.904226830 |
| O  | -0.389288440 | -3.177364710 | -4.893834140 |
| O  | 0.797965680  | -5.575077780 | -4.896478380 |
| O  | 3.191761750  | -1.168386860 | -6.191161860 |
| H  | -2.606927230 | -3.403238290 | -6.232996810 |
| H  | 2.081726290  | -7.381173770 | -6.232996920 |
| H  | -0.310221720 | -7.381173770 | -6.232996920 |
| O  | -1.450725640 | -1.173932420 | -6.254748530 |
| H  | 4.378331800  | -3.403238290 | -6.232996810 |
| O  | 2.188215020  | -3.186515830 | -7.577608290 |
| O  | -0.470833620 | -3.279359500 | -7.574030330 |
| O  | 0.934177010  | -5.583030260 | -7.577969090 |
| H  | 0.885752280  | -4.038718900 | -9.567020400 |
| Si | 0.899752640  | -4.039951850 | -4.352992580 |
| Si | 3.040152280  | -2.794838900 | -6.227920400 |
| Si | -1.268747720 | -2.794838900 | -6.227920400 |
| Si | 0.885752280  | -6.526468900 | -6.227920400 |
| Si | 0.885752280  | -4.038718900 | -8.097020400 |

|    |              |              |              |
|----|--------------|--------------|--------------|
| O  | 0.892943480  | -4.141878330 | -2.764382980 |
| O  | 2.282941550  | -3.568692250 | -0.543220330 |
| O  | -0.367793210 | -3.165727930 | -0.692827370 |
| O  | 0.678437350  | -5.675037370 | -0.709006080 |
| O  | 2.929839910  | -1.178640700 | 0.445151160  |
| O  | -2.805017940 | -3.425519570 | 0.774374480  |
| H  | 2.081726290  | -7.381173770 | 0.696256120  |
| O  | -0.389135310 | -7.547695290 | 0.795701630  |
| O  | -1.277859180 | -1.033844620 | 0.390660810  |
| H  | 4.378331800  | -3.403238290 | 0.696256020  |
| O  | 2.323848870  | -3.175301110 | 2.127662240  |
| O  | -0.330158580 | -3.097174590 | 2.233506330  |
| O  | 0.915047700  | -5.458910160 | 1.936156850  |
| O  | 1.064998570  | -4.182193240 | 4.231270030  |
| O  | -2.034060030 | -7.489718260 | 2.895285760  |
| O  | -3.552571730 | -4.903332170 | 2.900747800  |
| O  | -2.635009140 | -6.086542660 | 0.695257360  |
| O  | -2.670751240 | -6.092528360 | 5.071858520  |
| O  | 3.128293650  | -1.172198670 | 5.088884210  |
| O  | -2.763986890 | -3.385479840 | 4.972194460  |
| H  | 2.076451920  | -7.445738180 | 5.141318580  |
| O  | -0.390693430 | -7.489633400 | 4.979091680  |
| O  | -1.325160470 | -1.125952930 | 5.205398260  |
| H  | 4.431635520  | -3.366380800 | 5.141321510  |
| O  | 2.202677200  | -3.288356940 | 6.445661320  |
| O  | -0.445087830 | -3.347633470 | 6.317214370  |
| O  | 0.885427200  | -5.572363410 | 6.468234030  |
| H  | 4.190129080  | -2.130853440 | 7.211254890  |
| H  | -2.418724510 | -2.130853440 | 7.211254890  |
| H  | 0.885752280  | -7.854347380 | 7.211254170  |
| Si | 0.875517330  | -4.096890500 | -1.156961330 |
| Si | 3.040152280  | -2.794838900 | 0.691179600  |
| Al | -1.233999530 | -2.757594240 | 0.803694780  |
| Si | 0.885752280  | -6.526468900 | 0.691179600  |
| Si | -1.948047720 | -7.475568900 | 1.284479600  |
| Si | -3.507547720 | -4.774418900 | 1.284479600  |
| Si | 0.967088820  | -3.963214780 | 2.631712930  |
| Si | 0.919633950  | -4.076522130 | 5.849859750  |
| Si | -1.947747720 | -7.476038900 | 4.513979600  |
| Si | -3.507847720 | -4.773948900 | 4.513979600  |
| Si | 3.552752280  | -2.498898900 | 5.938779600  |
| Si | -1.781347720 | -2.498898900 | 5.938779600  |
| Si | 0.885752280  | -7.118338900 | 5.938779600  |
| O  | -0.453353310 | 3.506493020  | -4.880695830 |
| O  | 2.208230550  | 3.530268850  | -4.896216170 |
| O  | 0.870719540  | 5.836001010  | -4.884109130 |
| O  | -1.446380280 | 1.432466530  | -6.181806590 |
| H  | 4.378348870  | 3.670922930  | -6.232996880 |
| H  | -0.310238870 | 7.648841960  | -6.232996990 |
| H  | 2.081743440  | 7.648841960  | -6.232996990 |
| O  | 3.213446750  | 1.441094510  | -6.224251730 |

|    |              |             |              |
|----|--------------|-------------|--------------|
| H  | -2.606944310 | 3.670922930 | -6.232996880 |
| O  | -0.434901060 | 3.480936260 | -7.571918800 |
| O  | 2.219111760  | 3.511441440 | -7.576291650 |
| O  | 0.870143870  | 5.849056020 | -7.574312520 |
| H  | 0.885752280  | 4.306461100 | -9.567020400 |
| H  | 2.498831740  | 0.133861100 | -8.290243620 |
| H  | -0.727327180 | 0.133861100 | -8.290243620 |
| O  | 0.881399760  | 0.161403830 | -6.276869290 |
| Si | 0.879193180  | 4.294876120 | -4.348507680 |
| Si | -1.268747720 | 3.062561100 | -6.227920400 |
| Si | 3.040152280  | 3.062561100 | -6.227920400 |
| Si | 0.885752280  | 6.794161100 | -6.227920400 |
| Si | 2.445252280  | 0.133861100 | -6.821220400 |
| Si | -0.673747720 | 0.133861100 | -6.821220400 |
| Si | 0.885752280  | 4.306461100 | -8.097020400 |
| O  | 0.847240370  | 4.266860380 | -2.749876450 |
| O  | -0.462453490 | 3.535961370 | -0.607106420 |
| O  | 2.216594900  | 3.719462510 | -0.562838060 |
| O  | 0.744533210  | 5.920304770 | -0.691636760 |
| O  | -1.437399780 | 1.499576310 | 0.685029280  |
| H  | 4.378348870  | 3.670922930 | 0.696256080  |
| O  | -0.391739230 | 7.802674130 | 0.791722720  |
| H  | -4.877970750 | 5.047771360 | 0.752681480  |
| H  | 2.081743440  | 7.648841960 | 0.696256200  |
| O  | 3.141692900  | 1.445269790 | 0.528988730  |
| O  | -2.773368340 | 3.698427390 | 0.704521840  |
| H  | -2.638208540 | 8.927221270 | 0.752674810  |
| O  | -0.465730890 | 3.559958840 | 2.100513600  |
| O  | 2.214463550  | 3.413368490 | 2.088417120  |
| O  | 0.950326850  | 5.780991730 | 1.987831720  |
| O  | 0.913675940  | 4.335689590 | 4.218545310  |
| O  | -1.296182510 | 0.005696230 | 2.864196570  |
| O  | -2.021455240 | 7.772156980 | 2.898298610  |
| O  | 3.056967050  | 0.074822160 | 2.795444100  |
| O  | -3.536215350 | 5.046763720 | 2.895501050  |
| O  | 0.861080150  | 0.318987760 | 1.399386230  |
| O  | -2.640859510 | 6.343765700 | 0.755692610  |
| O  | 0.902202770  | 0.143176770 | 4.415744760  |
| O  | -2.684471420 | 6.365990280 | 5.047270890  |
| O  | -1.298929450 | 1.497018580 | 5.043632100  |
| H  | 4.431616300  | 3.634078500 | 5.141338950  |
| O  | -0.395752420 | 7.753226720 | 4.988581480  |
| H  | -4.891397790 | 5.038933640 | 5.010650260  |
| H  | 2.076463380  | 7.713399990 | 5.141310900  |
| O  | 3.135458190  | 1.467955440 | 5.034879820  |
| O  | -2.765020970 | 3.680304790 | 5.013437300  |
| H  | -2.637236330 | 8.943274920 | 5.010640510  |
| O  | -0.459774470 | 3.605443770 | 6.402494390  |
| O  | 2.194973460  | 3.556191400 | 6.419109320  |
| O  | 0.889177760  | 5.827696590 | 6.420948170  |
| H  | -2.418730450 | 2.398566900 | 7.211266740  |

|    |              |              |              |
|----|--------------|--------------|--------------|
| H  | 4.190135010  | 2.398566900  | 7.211266740  |
| H  | 0.885752280  | 8.122049090  | 7.211266020  |
| Si | 0.848378670  | 4.358081740  | -1.150436790 |
| Si | -1.267534080 | 3.100865270  | 0.756153800  |
| Si | 3.040152280  | 3.062561100  | 0.691179600  |
| Si | 0.885752280  | 6.794161100  | 0.691179600  |
| Si | -0.756578040 | 0.172320690  | 1.342590270  |
| Si | -1.948047720 | 7.743261100  | 1.284479600  |
| Si | 2.475639870  | 0.155254010  | 1.272575020  |
| Si | -3.507547720 | 5.042161100  | 1.284479600  |
| Si | 0.923398950  | 4.270754620  | 2.613521500  |
| Si | 0.884220220  | 4.314031440  | 5.856023490  |
| Si | -0.728911870 | 0.126999100  | 4.388572560  |
| Si | -1.947747720 | 7.743761100  | 4.513979600  |
| Si | 2.534088920  | 0.130361760  | 4.340688870  |
| Si | -3.507847720 | 5.041661100  | 4.513979600  |
| Si | -1.781347720 | 2.766561100  | 5.938779600  |
| Si | 3.552752280  | 2.766561100  | 5.938779600  |
| Si | 0.885752280  | 7.386061100  | 5.938779600  |
| O  | -3.085485790 | -0.821517760 | -3.657817970 |
| O  | -3.609280050 | -0.697606310 | -1.581930300 |
| Nd | -1.216346170 | -1.104696440 | -2.057996910 |
| O  | -5.131446240 | -0.443035890 | -3.088966080 |
| N  | -3.992364860 | -0.644748330 | -2.786040630 |
| H  | -2.972362540 | -3.200946380 | -3.352393720 |
| O  | -2.304209550 | -3.203977860 | -2.659867740 |
| H  | -2.131635290 | -4.153388000 | -2.399552350 |
| O  | -0.409530340 | 0.341726670  | -3.851837480 |
| O  | -1.942713760 | 1.337980540  | -2.029377860 |
| H  | -2.605493250 | 1.427352360  | -1.330785100 |
| H  | -1.237588860 | 1.964196070  | -1.802200870 |
| H  | 0.333963750  | 0.241627800  | -4.465925050 |
| H  | -1.065459410 | 0.914007960  | -4.273837570 |
| H  | -0.993202330 | -5.981837870 | -1.975380900 |
| O  | -1.921497800 | -5.708833790 | -2.020342000 |
| H  | -2.234751420 | -5.837424860 | -1.105282770 |
| O  | 1.179709430  | -1.362168670 | -2.643798480 |
| N  | 1.582186110  | -0.262581300 | -2.154517860 |
| O  | 2.638854230  | 0.213847360  | -2.447535480 |
| O  | 0.775685270  | 0.301453990  | -1.364769900 |

bulk-T3-Nd:

|   |              |              |              |
|---|--------------|--------------|--------------|
| H | -2.458528330 | -8.740437440 | 0.752824970  |
| H | -4.698300600 | -4.860982280 | 0.752823810  |
| H | -2.457562900 | -8.756454580 | 5.010780250  |
| H | -4.711727890 | -4.852147540 | 5.010792530  |
| O | 2.474407520  | -3.407027690 | -4.869872890 |
| O | -0.151978760 | -3.334007630 | -4.983870000 |
| O | 1.081895120  | -5.690009710 | -4.856068060 |
| O | 3.375483320  | -1.249015320 | -6.188455000 |
| H | -2.427257280 | -3.484137120 | -6.232854560 |

|    |              |              |              |
|----|--------------|--------------|--------------|
| H  | 2.261396240  | -7.462072600 | -6.232854670 |
| H  | -0.130551770 | -7.462072600 | -6.232854670 |
| O  | -1.262034520 | -1.244332620 | -6.207681810 |
| H  | 4.558001750  | -3.484137120 | -6.232854560 |
| O  | 2.382117940  | -3.295102450 | -7.570537460 |
| O  | -0.285225910 | -3.316727220 | -7.606135120 |
| O  | 1.080752840  | -5.658829120 | -7.567352460 |
| H  | 1.065422230  | -4.119617730 | -9.566878150 |
| Si | 1.103509540  | -4.136241090 | -4.358499970 |
| Si | 3.219822230  | -2.875737730 | -6.227778150 |
| Si | -1.089077770 | -2.875737730 | -6.227778150 |
| Si | 1.065422230  | -6.607367730 | -6.227778150 |
| Si | 1.065422230  | -4.119617730 | -8.096878150 |
| O  | 1.067085070  | -4.058834920 | -2.756078820 |
| O  | 2.239966530  | -3.345642030 | -0.535562580 |
| O  | -0.426196960 | -3.624493770 | -0.619301160 |
| O  | 1.115549650  | -5.773882340 | -0.726042330 |
| O  | 3.454959080  | -1.260031980 | 0.634674750  |
| O  | -2.629631280 | -3.418152090 | 0.898278760  |
| H  | 2.261396240  | -7.462072600 | 0.696398370  |
| O  | -0.221570570 | -7.608296760 | 0.751432680  |
| O  | -1.251185460 | -1.284418110 | 0.348715420  |
| H  | 4.558001750  | -3.484137120 | 0.696398270  |
| O  | 2.463567920  | -3.292337050 | 2.109004450  |
| O  | -0.194467090 | -3.135487480 | 1.995483410  |
| O  | 0.987099860  | -5.532277300 | 1.940789740  |
| O  | 0.993969890  | -4.103294060 | 4.172787650  |
| O  | -1.823480320 | -7.589415480 | 2.896942090  |
| O  | -3.415057520 | -4.935458480 | 2.899572320  |
| O  | -2.432119030 | -6.130659330 | 0.754876270  |
| O  | -2.496056780 | -6.176751910 | 5.052857480  |
| O  | 3.420194300  | -1.265414660 | 5.003851690  |
| O  | -2.562114440 | -3.494104860 | 4.978681150  |
| H  | 2.256121870  | -7.526637010 | 5.141460830  |
| O  | -0.218499680 | -7.581375440 | 4.999258770  |
| O  | -1.198835920 | -1.256567570 | 5.093462540  |
| H  | 4.611305470  | -3.447279630 | 5.141463760  |
| O  | 2.346032730  | -3.338032720 | 6.360642760  |
| O  | -0.284790860 | -3.414887690 | 6.407969090  |
| O  | 1.082329940  | -5.627312700 | 6.373210450  |
| H  | 4.369799030  | -2.211752270 | 7.211397140  |
| H  | -2.239054560 | -2.211752270 | 7.211397140  |
| H  | 1.065422230  | -7.935246210 | 7.211396420  |
| Si | 0.999237000  | -4.209062320 | -1.165391010 |
| Si | 3.219822230  | -2.875737730 | 0.691321850  |
| Si | -1.107889240 | -2.871135350 | 0.655414390  |
| Si | 1.065422230  | -6.607367730 | 0.691321850  |
| Si | -1.768377770 | -7.556467730 | 1.284621850  |
| Si | -3.327877770 | -4.855317730 | 1.284621850  |
| Si | 1.069625930  | -4.017427570 | 2.564793020  |
| Si | 1.040654110  | -4.113806660 | 5.809052540  |



|    |              |              |              |
|----|--------------|--------------|--------------|
| Si | -1.768077770 | -7.556937730 | 4.514121850  |
| Si | -3.328177770 | -4.854847730 | 4.514121850  |
| Si | 3.732422230  | -2.579797730 | 5.938921850  |
| Si | -1.601677770 | -2.579797730 | 5.938921850  |
| Si | 1.065422230  | -7.199237730 | 5.938921850  |
| O  | -0.243994960 | 3.418684780  | -4.893569610 |
| O  | 2.414727640  | 3.472720710  | -4.889687400 |
| O  | 1.045755660  | 5.767689480  | -4.878819860 |
| O  | -1.287957670 | 1.351932490  | -6.189155980 |
| H  | 4.558018820  | 3.590024100  | -6.232854630 |
| H  | -0.130568920 | 7.567943130  | -6.232854740 |
| H  | 2.261413390  | 7.567943130  | -6.232854740 |
| O  | 3.403438820  | 1.360470250  | -6.217535430 |
| H  | -2.427274360 | 3.590024100  | -6.232854630 |
| O  | -0.264378190 | 3.413622150  | -7.574542890 |
| O  | 2.393205320  | 3.426249530  | -7.572497600 |
| O  | 1.058333280  | 5.768508740  | -7.572662110 |
| H  | 1.065422230  | 4.225562270  | -9.566878150 |
| H  | 2.678501690  | 0.052962270  | -8.290101370 |
| H  | -0.547657230 | 0.052962270  | -8.290101370 |
| O  | 1.062436420  | 0.103574610  | -6.305399760 |
| Si | 1.073317520  | 4.224691540  | -4.357708780 |
| Si | -1.089077770 | 2.981662270  | -6.227778150 |
| Si | 3.219822230  | 2.981662270  | -6.227778150 |
| Si | 1.065422230  | 6.713262270  | -6.227778150 |
| Si | 2.624922230  | 0.052962270  | -6.821078150 |
| Si | -0.494077770 | 0.052962270  | -6.821078150 |
| Si | 1.065422230  | 4.225562270  | -8.096878150 |
| O  | 1.058473390  | 4.193466530  | -2.761259220 |
| O  | -0.379683690 | 3.603070100  | -0.658404180 |
| O  | 2.300904800  | 3.442576940  | -0.584608350 |
| O  | 1.089161660  | 5.832486230  | -0.696213510 |
| O  | -1.349963020 | 1.342822850  | 0.376360590  |
| H  | 4.558018820  | 3.590024100  | 0.696398330  |
| O  | -0.227138210 | 7.711092060  | 0.731979550  |
| H  | -4.698300800 | 4.966872530  | 0.752823730  |
| H  | 2.261413390  | 7.567943130  | 0.696398450  |
| O  | 3.508455220  | 1.374550790  | 0.666032430  |
| O  | -2.648916120 | 3.570592030  | 0.721735810  |
| H  | -2.458538590 | 8.846322440  | 0.752817060  |
| O  | -0.283269990 | 3.284993770  | 1.982610660  |
| O  | 2.388033970  | 3.386839310  | 2.067084080  |
| O  | 0.970468990  | 5.659168200  | 1.961630670  |
| O  | 0.956393130  | 4.184440850  | 4.163647550  |
| O  | -0.553419110 | 0.041018190  | 2.883748810  |
| O  | -1.814422210 | 7.688994380  | 2.895829510  |
| O  | 2.651771210  | 0.045675310  | 2.825953080  |
| O  | -3.367074080 | 4.968760970  | 2.893078610  |
| O  | 1.178853380  | 0.127876180  | 0.580373480  |
| O  | -2.458492840 | 6.252816220  | 0.757230220  |
| O  | 1.103712740  | 0.059952210  | 4.997280480  |

|    |              |              |              |
|----|--------------|--------------|--------------|
| O  | -2.511998330 | 6.290640960  | 5.040855310  |
| O  | -1.193409340 | 1.383349320  | 5.066410580  |
| H  | 4.611286250  | 3.553179670  | 5.141481200  |
| O  | -0.222496220 | 7.687751460  | 5.004228090  |
| H  | -4.711727840 | 4.958034810  | 5.010792510  |
| H  | 2.256133330  | 7.632501160  | 5.141453150  |
| O  | 3.423462990  | 1.375232020  | 4.996441650  |
| O  | -2.571831480 | 3.609819790  | 5.004175030  |
| H  | -2.457566380 | 8.862376090  | 5.010782760  |
| O  | -0.288902670 | 3.522619260  | 6.419610660  |
| O  | 2.342877630  | 3.445248790  | 6.347033300  |
| O  | 1.080729670  | 5.729919540  | 6.354647210  |
| H  | -2.239060500 | 2.317668070  | 7.211408990  |
| H  | 4.369804960  | 2.317668070  | 7.211408990  |
| H  | 1.065422230  | 8.041150260  | 7.211408270  |
| Si | 1.020389700  | 4.270509320  | -1.163656270 |
| Si | -1.134315970 | 2.930190780  | 0.622232510  |
| Si | 3.219822230  | 2.981662270  | 0.691321850  |
| Si | 1.065422230  | 6.713262270  | 0.691321850  |
| Al | -0.453987570 | 0.046835060  | 1.193283380  |
| Si | -1.768377770 | 7.662362270  | 1.284621850  |
| Si | 2.679633800  | 0.066743480  | 1.199131620  |
| Si | -3.327877770 | 4.961262270  | 1.284621850  |
| Si | 1.013139490  | 4.127648450  | 2.553624460  |
| Si | 1.031501250  | 4.212493100  | 5.800802800  |
| Si | -0.458153670 | 0.054120250  | 4.478609800  |
| Si | -1.768077770 | 7.662862270  | 4.514121850  |
| Si | 2.644967910  | 0.053329820  | 4.453944630  |
| Si | -3.328177770 | 4.960762270  | 4.514121850  |
| Si | -1.601677770 | 2.685662270  | 5.938921850  |
| Si | 3.732422230  | 2.685662270  | 5.938921850  |
| Si | 1.065422230  | 7.305162270  | 5.938921850  |
| H  | -3.627473070 | 2.611061520  | -0.416331130 |
| H  | -2.054133770 | 0.995327340  | -4.282845700 |
| H  | -0.851330550 | 1.474799300  | -3.438310420 |
| O  | -5.060023120 | -0.152078360 | -1.895132290 |
| O  | -3.850038220 | -0.422623860 | -3.633634380 |
| N  | -5.007322830 | -0.401986160 | -3.144210780 |
| O  | -5.992961070 | -0.596409320 | -3.790126750 |
| O  | -1.804877380 | 1.318680420  | -3.402417130 |
| O  | -3.789243350 | 2.026483410  | -1.178578000 |
| H  | -4.717250150 | 1.754039690  | -1.191948330 |
| Nd | -2.525419780 | -0.084958570 | -1.505303880 |
| H  | -4.808851440 | -1.053686150 | -0.100028180 |
| H  | -3.664349270 | -1.723111580 | 0.692323670  |
| O  | -4.010977060 | -0.856971560 | 0.415447400  |
| O  | 0.092089530  | 0.109991740  | -1.910536630 |
| H  | 0.277332530  | -0.744434270 | -2.326448410 |
| H  | 0.685778330  | 0.163999510  | -1.129569940 |
| O  | -3.183396550 | -2.443555820 | -1.733787660 |
| O  | -1.507556410 | -1.849932470 | -2.908930270 |

|   |              |              |              |
|---|--------------|--------------|--------------|
| N | -2.337725910 | -2.758479650 | -2.619115240 |
| O | -2.330356880 | -3.836728680 | -3.135676660 |

surf-silanol-Nd:

|   |              |              |              |
|---|--------------|--------------|--------------|
| O | -2.585370940 | 2.207023390  | 1.472913750  |
| O | -5.210576890 | 2.153616550  | 1.689205800  |
| O | -3.842148260 | -0.146036830 | 1.636015360  |
| O | 2.373465080  | -3.628877230 | 1.458164040  |
| O | 4.984811020  | -3.552604960 | 1.715584350  |
| O | 3.633235110  | -1.274925520 | 1.664598530  |
| O | -1.367920220 | 4.244549300  | 0.252450510  |
| H | -7.241218050 | 2.028592860  | 0.270763200  |
| O | -2.412109030 | -2.016179150 | 0.440787630  |
| H | 1.181854870  | -5.486419570 | 0.270763200  |
| O | 7.144898550  | -3.424609720 | 0.180685210  |
| O | 2.112557380  | 0.605193700  | 0.553917770  |
| H | -4.944562830 | -1.949330660 | 0.270763200  |
| O | -6.116808250 | 4.254505380  | 0.257746080  |
| O | -0.135770000 | 1.909999740  | 0.558400360  |
| O | 4.754258210  | 0.693845450  | 0.244856620  |
| H | 5.775165300  | -5.486419580 | 0.270763200  |
| O | -0.129905420 | -3.301419410 | 0.484742220  |
| O | -2.223718190 | 2.123641440  | -1.153750560 |
| O | -4.915397670 | 2.209405040  | -0.978327120 |
| O | -3.643020070 | -0.152444200 | -1.063509880 |
| O | 1.975616790  | -3.501561010 | -1.160928530 |
| O | 4.685357850  | -3.476494030 | -0.963464650 |
| O | 3.313699010  | -1.187269850 | -1.005480030 |
| O | -3.708764400 | 1.379870150  | -3.193109390 |
| O | 3.448540180  | -2.694420770 | -3.187692090 |
| O | -1.152857260 | -2.481078880 | -1.828843700 |
| O | 0.898380180  | 1.131647890  | -1.786597760 |
| O | -0.155621190 | -0.676678540 | -0.169102960 |
| O | -0.124505850 | -0.669197840 | -3.498593740 |
| H | -1.393369590 | 4.127843980  | -4.174313340 |
| O | -2.398659280 | -1.958093360 | -4.085238920 |
| H | 1.123299150  | -5.514167830 | -4.174313340 |
| O | 2.148841870  | 0.622402060  | -4.062922330 |
| H | -4.939315660 | -2.013915540 | -4.174313340 |
| O | -0.138866930 | 1.938424370  | -4.072906780 |
| H | 4.669245870  | 0.627591310  | -4.174313340 |
| O | -0.119226310 | -3.279278820 | -4.115713000 |
| O | -2.450453390 | 2.159628400  | -5.423139490 |
| H | -4.944490580 | 2.083578020  | -5.326221920 |
| O | -3.795638080 | -0.113237880 | -5.422550100 |
| O | 2.199883320  | -3.579266080 | -5.416494530 |
| H | 4.674420430  | -3.469902770 | -5.326222030 |
| O | 3.482148340  | -1.271046320 | -5.435048540 |
| H | -0.444164750 | 3.300924490  | -6.244204220 |
| H | -3.748580360 | -2.422491560 | -6.244204070 |
| H | 0.174094280  | -4.687248820 | -6.244204070 |

|    |              |              |              |
|----|--------------|--------------|--------------|
| H  | 3.478510170  | 1.036167070  | -6.244204220 |
| Si | -3.835767900 | 1.419278260  | 2.210099120  |
| Si | 3.597361240  | -2.830829210 | 2.207844320  |
| Si | -1.585225550 | 2.632886740  | 0.276990540  |
| Si | -5.903040780 | 2.636997510  | 0.275800360  |
| Si | -3.748580370 | -1.094637390 | 0.275800360  |
| Si | 1.324049720  | -4.023321740 | 0.275800360  |
| Si | 5.632970560  | -4.023321740 | 0.275800360  |
| Si | 3.470219210  | -0.299716030 | 0.378225270  |
| Si | -0.938490070 | -2.102684220 | -0.259374950 |
| Si | 0.687196680  | 0.710274850  | -0.228171090 |
| Si | -3.631527250 | 1.397063910  | -1.591073720 |
| Si | 3.362038530  | -2.726689440 | -1.574952410 |
| Si | -3.748580370 | 1.393118720  | -4.822272780 |
| Si | 3.478510370  | -2.779443320 | -4.822272780 |
| Si | -0.936291670 | -2.083481690 | -3.392097590 |
| Si | 0.691780440  | 0.739432490  | -3.363393610 |
| Si | -1.081547480 | 2.932931860  | -4.971716630 |
| Si | -3.748580360 | -1.686505340 | -4.971716630 |
| Si | 0.811477040  | -4.319255710 | -4.971716630 |
| Si | 3.478510570  | 0.300181120  | -4.971716630 |
| O  | 3.475560050  | -2.891080710 | 3.826260930  |
| O  | -3.598839270 | 1.459221710  | 3.788596440  |
| H  | -5.988387600 | 6.755316850  | 0.214336190  |
| H  | -1.508773210 | 6.755316890  | 0.214336210  |
| H  | -2.135514420 | 5.565681860  | -1.786532060 |
| H  | -5.361646310 | 5.565681860  | -1.786532060 |
| O  | -3.746643580 | 5.519926440  | 0.206940760  |
| Si | -2.189074680 | 5.565681860  | -0.317508130 |
| Si | -5.308086050 | 5.565681860  | -0.317508130 |
| H  | 7.002405980  | 1.841385300  | 0.214336210  |
| H  | 9.242213140  | -2.038074580 | 0.214336190  |
| H  | 6.285522420  | 0.703793970  | -1.786532060 |
| H  | 7.898588370  | -2.090118200 | -1.786532060 |
| O  | 7.049419800  | -0.717072660 | 0.205401350  |
| Si | 6.312302550  | 0.657409430  | -0.317508130 |
| Si | 7.871808240  | -2.043733660 | -0.317508130 |
| H  | 2.640117660  | -2.509296860 | 4.131276290  |
| H  | -0.022769000 | 2.086983290  | 2.534466180  |
| Nd | -1.658020710 | 0.791475450  | 4.844987080  |
| H  | -3.243446210 | 2.916280050  | 4.817215030  |
| H  | 0.605448390  | 2.557018800  | 3.887293890  |
| H  | -3.240798620 | 0.489478710  | 7.291433250  |
| H  | -4.249511390 | 1.059834860  | 6.263372200  |
| O  | 0.079860030  | 2.003299090  | 6.149048280  |
| O  | -1.083917670 | 0.571790510  | 7.235959110  |
| N  | -0.149964740 | 1.434949240  | 7.255345320  |
| O  | 0.947181900  | -1.718393110 | 2.901768990  |
| O  | 0.255128200  | -0.770242150 | 4.702031280  |
| O  | -0.738817080 | -0.383685480 | 2.842286470  |
| N  | 0.179855520  | -0.983747100 | 3.465847590  |

|   |              |              |             |
|---|--------------|--------------|-------------|
| O | 0.456451650  | 1.692074650  | 8.249654470 |
| O | -3.641892130 | 0.326031330  | 6.424380610 |
| O | -0.228485890 | 2.330190530  | 3.456537830 |
| O | -2.870589510 | -1.374974040 | 4.282132710 |
| O | -2.668156880 | 3.013105430  | 5.608173750 |
| H | -3.090427660 | -1.299999060 | 3.338243450 |
| H | -3.715371950 | -1.323396760 | 4.747854840 |
| H | -2.129598180 | 3.802333430  | 5.483807300 |

surf-T2-Nd:

|   |              |              |              |
|---|--------------|--------------|--------------|
| O | -2.524603690 | 1.956517760  | 2.112257120  |
| O | -5.188667620 | 2.181530810  | 1.932093810  |
| O | -4.047868390 | -0.211357580 | 1.766550910  |
| O | 2.183226050  | -3.690797060 | 1.758074180  |
| O | 4.832010950  | -3.719362100 | 1.912351050  |
| O | 3.532847300  | -1.410752060 | 1.964510440  |
| O | -1.448995080 | 4.148316580  | 0.618457320  |
| H | -7.322402810 | 1.864467160  | 0.511773030  |
| O | -2.395842570 | -2.016600770 | 0.811392470  |
| H | 1.100677190  | -5.650552840 | 0.511773030  |
| O | 7.058989170  | -3.574262890 | 0.456972580  |
| O | 2.126275630  | 0.502484320  | 0.763507290  |
| H | -5.025742810 | -2.113462840 | 0.511773030  |
| O | -6.220524500 | 4.083242600  | 0.432793580  |
| O | -0.174075820 | 1.595935650  | 0.971971020  |
| O | 4.698930030  | 0.526279510  | 0.533265090  |
| H | 5.693987190  | -5.650552840 | 0.511773030  |
| O | -0.254644400 | -3.536045340 | 0.673566450  |
| O | -2.416175540 | 1.860023630  | -0.841042160 |
| O | -5.084055600 | 1.902582140  | -0.734719480 |
| O | -3.754660050 | -0.443853210 | -0.906394300 |
| O | 1.934594000  | -3.676843720 | -0.898444730 |
| O | 4.646857540  | -3.661169680 | -0.764761930 |
| O | 3.285660940  | -1.376705140 | -0.736612490 |
| O | -3.832421790 | 1.189370950  | -2.960350420 |
| O | 3.363953620  | -2.847349120 | -2.947247310 |
| O | -1.313907750 | -2.587439710 | -1.574367710 |
| O | 0.782552080  | 0.981543090  | -1.514971970 |
| O | -0.041099830 | -0.948294210 | 0.109483890  |
| O | -0.191621950 | -0.835708990 | -3.236994540 |
| H | -1.474552810 | 3.963717160  | -3.933296970 |
| O | -2.458155700 | -2.138970820 | -3.881690660 |
| H | 1.042117190  | -5.678292840 | -3.933296970 |
| O | 2.082365760  | 0.456026690  | -3.786697840 |
| H | -5.020492810 | -2.178042840 | -3.933296970 |
| O | -0.205230670 | 1.778296110  | -3.832648310 |
| H | 4.588067190  | 0.463457160  | -3.933296970 |
| O | -0.175156980 | -3.453025870 | -3.822095700 |
| O | -2.525744270 | 1.990632780  | -5.175353300 |
| H | -5.025672810 | 1.919447160  | -5.085206970 |
| O | -3.862222350 | -0.279108260 | -5.189609580 |

|    |              |              |              |
|----|--------------|--------------|--------------|
| O  | 2.118063270  | -3.741631790 | -5.176046330 |
| H  | 4.593237190  | -3.634032840 | -5.085206970 |
| O  | 3.398305700  | -1.434780270 | -5.194401320 |
| H  | -0.525342810 | 3.136797160  | -6.003186970 |
| H  | -3.829762810 | -2.586622840 | -6.003186970 |
| H  | 0.092917190  | -4.851382840 | -6.003186970 |
| H  | 3.397327190  | 0.872037160  | -6.003186970 |
| Si | -3.967533900 | 1.256161280  | 2.496041890  |
| Si | 3.482991650  | -2.986152470 | 2.477553970  |
| Al | -1.693149870 | 2.421197620  | 0.602380090  |
| Si | -5.984222810 | 2.472867160  | 0.516813030  |
| Si | -3.829762810 | -1.258762840 | 0.516813030  |
| Si | 1.242867190  | -4.187452840 | 0.516813030  |
| Si | 5.551787190  | -4.187452840 | 0.516813030  |
| Si | 3.432713400  | -0.487720410 | 0.633454390  |
| Si | -0.996615600 | -2.263306310 | -0.015394110 |
| Si | 0.640866210  | 0.527851230  | 0.044340170  |
| Si | -3.763475860 | 1.143620350  | -1.353750090 |
| Si | 3.313320710  | -2.907259650 | -1.338132110 |
| Si | -3.829762810 | 1.228987160  | -4.581256970 |
| Si | 3.397327190  | -2.943572840 | -4.581256970 |
| Si | -1.020959370 | -2.242390560 | -3.146692050 |
| Si | 0.611884360  | 0.582604390  | -3.103794820 |
| Si | -1.162722810 | 2.768797160  | -4.730706970 |
| Si | -3.829762810 | -1.850632840 | -4.730706970 |
| Si | 0.730297190  | -4.483382840 | -4.730706970 |
| Si | 3.397327190  | 0.136047160  | -4.730706970 |
| O  | 3.468643010  | -3.098198490 | 4.086840910  |
| O  | -4.099171450 | 0.980376520  | 4.103633450  |
| H  | -6.069562810 | 6.591187160  | 0.455353030  |
| H  | -1.589952810 | 6.591187160  | 0.455353030  |
| H  | -2.216692810 | 5.401557160  | -1.545516970 |
| H  | -5.442822810 | 5.401557160  | -1.545516970 |
| O  | -3.830909920 | 5.342548010  | 0.457753760  |
| Si | -2.270252810 | 5.401557160  | -0.076496970 |
| Si | -5.389262810 | 5.401557160  | -0.076496970 |
| H  | 6.921227190  | 1.677257160  | 0.455353030  |
| H  | 9.161037190  | -2.202202840 | 0.455353030  |
| H  | 6.204347190  | 0.539667160  | -1.545516970 |
| H  | 7.817407190  | -2.254252840 | -1.545516970 |
| O  | 6.969804320  | -0.879636480 | 0.441869480  |
| Si | 6.231127190  | 0.493277160  | -0.076496970 |
| Si | 7.790627190  | -2.207862840 | -0.076496970 |
| H  | -3.611329030 | 1.525104710  | 4.748502550  |
| H  | 2.666880460  | -2.736430450 | 4.505738480  |
| Nd | -0.468760020 | 1.711499190  | 3.590372620  |
| H  | -2.425802000 | 4.100845300  | 3.030100890  |
| H  | 2.622005310  | 1.600155780  | 3.736034660  |
| O  | -0.219962260 | 2.927121040  | 5.680836760  |
| O  | -1.916576720 | 1.634169240  | 5.553548350  |
| N  | -1.279507100 | 2.508363000  | 6.227771190  |

|   |              |              |             |
|---|--------------|--------------|-------------|
| O | 1.205954210  | -1.808599580 | 4.840952930 |
| O | 0.713446330  | 0.258907270  | 5.152035810 |
| O | 0.738987830  | -0.528902900 | 3.166884090 |
| N | 0.898831080  | -0.727695970 | 4.395658890 |
| O | -1.662624880 | 2.897759450  | 7.284958050 |
| O | 2.035211130  | 1.982147810  | 3.071794060 |
| O | -1.793866870 | -0.454753410 | 3.726405200 |
| O | -2.038477930 | 3.884987660  | 3.888486580 |
| H | -1.856188050 | -1.085619690 | 2.995618560 |
| H | -2.690935260 | -0.362164370 | 4.095224060 |
| H | -1.424782500 | 4.604004690  | 4.086682260 |
| H | 2.165356750  | 1.442705860  | 2.259183780 |
| O | 0.313252970  | 3.968698070  | 2.629414690 |
| H | 1.237015460  | 3.828168080  | 2.383329190 |
| H | -0.175570600 | 4.239435690  | 1.818736310 |

surf-T3-Nd:

|   |              |              |              |
|---|--------------|--------------|--------------|
| O | -2.960599970 | 2.078474700  | 1.989776980  |
| O | -5.580952770 | 1.866573080  | 2.014830280  |
| O | -4.083034550 | -0.342683990 | 1.987917830  |
| O | 1.744824590  | -3.642493840 | 1.943753520  |
| O | 4.390184020  | -3.860505300 | 2.021171590  |
| O | 3.312017950  | -1.463836110 | 2.098984800  |
| O | -1.727417360 | 4.073917580  | 0.666251230  |
| H | -7.653635640 | 1.819411690  | 0.650384730  |
| O | -2.924003220 | -2.375382440 | 0.618880960  |
| H | 0.769437280  | -5.695600740 | 0.650384730  |
| O | 6.724172610  | -3.593062670 | 0.665108750  |
| O | 1.757289010  | 0.429517770  | 1.038023530  |
| H | -5.356980420 | -2.158511830 | 0.650384730  |
| O | -6.513250430 | 4.050634840  | 0.673268870  |
| O | -0.480300840 | 1.811998670  | 0.960900240  |
| O | 4.343056910  | 0.545843600  | 0.663940560  |
| H | 5.362747710  | -5.695600750 | 0.650384730  |
| O | -0.608538580 | -3.634279550 | 0.646651460  |
| O | -2.672909520 | 1.934413040  | -0.647594490 |
| O | -5.361251170 | 2.047860170  | -0.647037820 |
| O | -4.101247330 | -0.333154390 | -0.678059080 |
| O | 1.710950330  | -3.761821090 | -0.714420220 |
| O | 4.407713480  | -3.629333070 | -0.655317490 |
| O | 2.948544310  | -1.396784860 | -0.570974450 |
| O | -4.058205580 | 1.210387040  | -2.806703830 |
| O | 3.038997590  | -2.867237670 | -2.804434310 |
| O | -1.298805430 | -2.223187000 | -1.509611100 |
| O | 0.308129520  | 0.480403720  | -1.529236290 |
| O | -0.701345300 | -0.963446920 | 0.770521940  |
| O | -0.546238430 | -0.886088950 | -3.683525700 |
| H | -1.805787180 | 3.918662810  | -3.794691810 |
| O | -2.847789800 | -2.240076400 | -3.668371790 |
| H | 0.710881560  | -5.723349000 | -3.794691810 |
| O | 1.752782170  | 0.467068260  | -3.709283330 |

|    |              |              |              |
|----|--------------|--------------|--------------|
| H  | -5.351733250 | -2.223096710 | -3.794691810 |
| O  | -0.531597470 | 1.778575310  | -3.673502830 |
| H  | 4.256828280  | 0.418410140  | -3.794691810 |
| O  | -0.555924620 | -3.557662280 | -3.676864830 |
| O  | -2.862906220 | 1.950487890  | -5.055112760 |
| H  | -5.356908170 | 1.874396850  | -4.946600390 |
| O  | -4.189194770 | -0.323489860 | -5.031060000 |
| O  | 1.778098630  | -3.771510860 | -5.027837930 |
| H  | 4.262002840  | -3.679083940 | -4.946600500 |
| O  | 3.081731360  | -1.481827240 | -5.054382990 |
| H  | -0.856582340 | 3.091743320  | -5.864582690 |
| H  | -4.160997950 | -2.631672730 | -5.864582540 |
| H  | -0.238323310 | -4.896429990 | -5.864582540 |
| H  | 3.066092580  | 0.826985900  | -5.864582690 |
| Si | -4.201236180 | 1.184056930  | 2.595936840  |
| Si | 3.110719700  | -3.024596070 | 2.622679990  |
| Si | -1.976007360 | 2.440790440  | 0.759175590  |
| Si | -6.315458370 | 2.427816340  | 0.655421890  |
| Si | -4.160997960 | -1.303818560 | 0.655421890  |
| Si | 0.911632130  | -4.232502910 | 0.655421890  |
| Si | 5.220552970  | -4.232502910 | 0.655421890  |
| Si | 3.075337760  | -0.510860820 | 0.804558210  |
| Si | -1.374191250 | -2.293233390 | 0.114109600  |
| Al | 0.208414320  | 0.386914840  | 0.152975990  |
| Si | -4.055833910 | 1.216249980  | -1.194008820 |
| Si | 3.027676420  | -2.925234100 | -1.193336610 |
| Si | -4.160997960 | 1.183937550  | -4.442651250 |
| Si | 3.066092780  | -2.988624490 | -4.442651250 |
| Si | -1.311894190 | -2.223958950 | -3.135057830 |
| Si | 0.235399960  | 0.451408700  | -3.127709710 |
| Si | -1.493965070 | 2.723750690  | -4.592095100 |
| Si | -4.160997950 | -1.895686510 | -4.592095100 |
| Si | 0.399059450  | -4.528436880 | -4.592095100 |
| Si | 3.066092980  | 0.090999950  | -4.592095100 |
| O  | 3.026515360  | -3.086853680 | 4.233083490  |
| O  | -4.168517310 | 1.158659290  | 4.211771980  |
| H  | -6.400805190 | 6.546135680  | 0.593957720  |
| H  | -1.921190800 | 6.546135720  | 0.593957740  |
| H  | -2.547932010 | 5.356500690  | -1.406910530 |
| H  | -5.774063900 | 5.356500690  | -1.406910530 |
| O  | -4.152533950 | 5.300479260  | 0.578831220  |
| Si | -2.601492270 | 5.356500690  | 0.062113400  |
| Si | -5.720503640 | 5.356500690  | 0.062113400  |
| H  | 6.589988390  | 1.632204130  | 0.593957740  |
| H  | 8.829795550  | -2.247255750 | 0.593957720  |
| H  | 5.873104830  | 0.494612800  | -1.406910530 |
| H  | 7.486170780  | -2.299299370 | -1.406910530 |
| O  | 6.625402550  | -0.922984510 | 0.579553330  |
| Si | 5.899884960  | 0.448228260  | 0.062113400  |
| Si | 7.459390650  | -2.252914830 | 0.062113400  |
| H  | -3.535149910 | 1.750761170  | 4.650755360  |



|    |              |              |             |
|----|--------------|--------------|-------------|
| H  | 3.228384810  | -2.256608710 | 4.703438750 |
| H  | -0.085783230 | 4.321785330  | 1.367168510 |
| H  | 1.791695840  | 4.082489400  | 4.995392450 |
| H  | 1.501189320  | 4.652798160  | 3.571196120 |
| O  | -0.910953010 | 3.208448520  | 3.638447160 |
| O  | 0.031634670  | 2.114765170  | 5.209365030 |
| N  | -1.013635170 | 2.664203500  | 4.769795180 |
| O  | -2.046320370 | 2.663171500  | 5.390315150 |
| O  | 2.046416770  | 4.018062630  | 4.066748520 |
| O  | 0.811179630  | 4.259072550  | 1.757571140 |
| H  | 1.439777070  | 4.233603260  | 1.024773560 |
| Nd | 1.090000110  | 1.923575380  | 2.964010320 |
| H  | 3.712067590  | 3.144237520  | 2.452480340 |
| O  | 1.767408610  | -0.135062970 | 4.217348430 |
| H  | 3.651828920  | 2.109244110  | 1.302131450 |
| O  | 3.253625280  | 1.387126030  | 4.122685770 |
| N  | 2.940517420  | 0.224218500  | 4.485014200 |
| O  | 3.151452220  | 2.836472680  | 1.726521310 |
| O  | -0.689098980 | 0.162626240  | 3.223530670 |
| H  | -0.415382620 | -0.484386580 | 3.887300820 |
| H  | -0.899314600 | -0.358108050 | 2.413965660 |
| O  | 3.723035750  | -0.505129630 | 5.042482970 |

bulk-T1-Yb:

|    |              |              |              |
|----|--------------|--------------|--------------|
| H  | -2.531359740 | -8.493215440 | 0.783684680  |
| H  | -4.771132010 | -4.613760280 | 0.783683520  |
| H  | -2.530394310 | -8.509232580 | 5.041639960  |
| H  | -4.784559300 | -4.604925540 | 5.041652240  |
| O  | 2.284454020  | -3.065590030 | -4.865003080 |
| O  | -0.417891170 | -3.045017400 | -4.806458870 |
| O  | 1.020253440  | -5.361148730 | -4.873255810 |
| O  | 3.333930640  | -1.009946580 | -6.206290750 |
| H  | -2.500088690 | -3.236915120 | -6.201994850 |
| H  | 2.188564830  | -7.214850600 | -6.201994960 |
| H  | -0.203383180 | -7.214850600 | -6.201994960 |
| O  | -1.387569350 | -0.990826730 | -6.169239590 |
| H  | 4.485170340  | -3.236915120 | -6.201994850 |
| O  | 2.342795250  | -3.108034070 | -7.545274460 |
| O  | -0.290311840 | -3.014323060 | -7.511224790 |
| O  | 0.943508600  | -5.415089000 | -7.547615710 |
| H  | 0.992590820  | -3.872395730 | -9.536018440 |
| Si | 0.969226440  | -3.842688420 | -4.311037920 |
| Si | 3.146990820  | -2.628515730 | -6.196918440 |
| Si | -1.161909180 | -2.628515730 | -6.196918440 |
| Si | 0.992590820  | -6.360145730 | -6.196918440 |
| Si | 0.992590820  | -3.872395730 | -8.066018440 |
| O  | 0.650690290  | -3.599620280 | -2.758743950 |
| O  | 2.363275100  | -3.100777900 | -0.590248970 |
| O  | -0.496236790 | -2.893799720 | -0.582136450 |
| O  | 0.809350060  | -5.520422340 | -0.645282330 |
| O  | 3.372152950  | -0.998856500 | 0.743625390  |

|    |              |              |              |
|----|--------------|--------------|--------------|
| O  | -2.744074330 | -3.179662260 | 0.808964950  |
| H  | 2.188564830  | -7.214850600 | 0.727258080  |
| O  | -0.276901200 | -7.393323060 | 0.870891070  |
| O  | -1.463536720 | -0.962745440 | 0.967246460  |
| H  | 4.485170340  | -3.236915120 | 0.727257980  |
| O  | 2.290641240  | -2.996326740 | 2.104375100  |
| O  | -0.377982830 | -3.146613830 | 2.105418320  |
| O  | 1.045091010  | -5.375045690 | 2.050716510  |
| O  | 0.980726460  | -3.876708680 | 4.241436440  |
| O  | -1.959542870 | -7.332682020 | 2.931999570  |
| O  | -3.450239490 | -4.625462760 | 2.927566440  |
| O  | -2.492900790 | -5.875499910 | 0.787051640  |
| O  | -2.570588750 | -5.926022090 | 5.085466150  |
| O  | 3.347438410  | -1.025744300 | 5.030170020  |
| O  | -2.653966690 | -3.247905670 | 5.041960970  |
| H  | 2.183290460  | -7.279415010 | 5.172320540  |
| O  | -0.288163170 | -7.319219740 | 5.018099730  |
| O  | -1.267089450 | -1.044788780 | 5.047033310  |
| H  | 4.538474060  | -3.200057630 | 5.172323470  |
| O  | 2.281813480  | -3.088860660 | 6.428802580  |
| O  | -0.347088710 | -3.148284310 | 6.438296400  |
| O  | 0.999736980  | -5.385782730 | 6.440330120  |
| H  | 4.296967620  | -1.964530270 | 7.242256850  |
| H  | -2.311885970 | -1.964530270 | 7.242256850  |
| H  | 0.992590820  | -7.688024210 | 7.242256130  |
| Al | 0.925186650  | -3.864426080 | -1.074986000 |
| Si | 3.146990820  | -2.628515730 | 0.722181560  |
| Si | -1.223797680 | -2.566844770 | 0.846373170  |
| Si | 0.992590820  | -6.360145730 | 0.722181560  |
| Si | -1.841209180 | -7.309245730 | 1.315481560  |
| Si | -3.400709180 | -4.608095730 | 1.315481560  |
| Si | 1.011821620  | -3.855770200 | 2.631680180  |
| Si | 0.982617570  | -3.873079640 | 5.873217630  |
| Si | -1.840909180 | -7.309715730 | 4.544981560  |
| Si | -3.401009180 | -4.607625730 | 4.544981560  |
| Si | 3.659590820  | -2.332575730 | 5.969781560  |
| Si | -1.674509180 | -2.332575730 | 5.969781560  |
| Si | 0.992590820  | -6.952015730 | 5.969781560  |
| O  | -0.344575840 | 3.702415550  | -4.868646530 |
| O  | 2.327827960  | 3.719959000  | -4.867821080 |
| O  | 0.984979100  | 6.013328240  | -4.851770480 |
| O  | -1.355636610 | 1.593340030  | -6.169551770 |
| H  | 4.485187410  | 3.837246100  | -6.201994920 |
| H  | -0.203400330 | 7.815165130  | -6.201995030 |
| H  | 2.188581980  | 7.815165130  | -6.201995030 |
| O  | 3.313362380  | 1.605234520  | -6.178508440 |
| H  | -2.500105770 | 3.837246100  | -6.201994920 |
| O  | -0.334078750 | 3.648617950  | -7.549430270 |
| O  | 2.325377350  | 3.672660730  | -7.547932740 |
| O  | 0.979125880  | 6.016290670  | -7.545344240 |
| H  | 0.992590820  | 4.472784270  | -9.536018440 |

|    |              |             |              |
|----|--------------|-------------|--------------|
| H  | 2.605670280  | 0.300184270 | -8.259241660 |
| H  | -0.620488640 | 0.300184270 | -8.259241660 |
| O  | 0.985425710  | 0.267853520 | -6.299757390 |
| Si | 0.988752070  | 4.468024280 | -4.318118870 |
| Si | -1.161909180 | 3.228884270 | -6.196918440 |
| Si | 3.146990820  | 3.228884270 | -6.196918440 |
| Si | 0.992590820  | 6.960484270 | -6.196918440 |
| Si | 2.552090820  | 0.300184270 | -6.790218440 |
| Si | -0.566909180 | 0.300184270 | -6.790218440 |
| Si | 0.992590820  | 4.472784270 | -8.066018440 |
| O  | 0.955934320  | 4.471962080 | -2.722740600 |
| O  | -0.373258590 | 3.719625430 | -0.560926700 |
| O  | 2.314185460  | 3.751596390 | -0.584621820 |
| O  | 0.946346090  | 6.031659720 | -0.623019470 |
| O  | -1.343552780 | 1.602700680 | 0.745619140  |
| H  | 4.485187410  | 3.837246100 | 0.727258040  |
| O  | -0.299321990 | 7.961289970 | 0.767126140  |
| H  | -4.771132210 | 5.214094530 | 0.783683440  |
| H  | 2.188581980  | 7.815165130 | 0.727258160  |
| O  | 3.283785200  | 1.605210310 | 0.693712150  |
| O  | -2.686082310 | 3.840322030 | 0.765457400  |
| H  | -2.531370000 | 9.093544440 | 0.783676770  |
| O  | -0.367489320 | 3.681722370 | 2.106969020  |
| O  | 2.310491780  | 3.663355330 | 2.083760500  |
| O  | 0.971281310  | 5.988210030 | 2.057337670  |
| O  | 0.990135880  | 4.478616370 | 4.231664860  |
| O  | -0.449021740 | 0.407677480 | 2.961498600  |
| O  | -1.887308290 | 7.941121880 | 2.929008780  |
| O  | 2.516761060  | 0.328814790 | 2.910759900  |
| O  | -3.449275840 | 5.229520580 | 2.928715000  |
| O  | 0.984818120  | 0.210430630 | 0.766375510  |
| O  | -2.541119420 | 6.511450900 | 0.791220220  |
| O  | 1.038788150  | 0.294241590 | 5.139801060  |
| O  | -2.580002730 | 6.534374900 | 5.078580650  |
| O  | -1.302227830 | 1.594719610 | 5.126031590  |
| H  | 4.538454840  | 3.800401670 | 5.172340910  |
| O  | -0.294602120 | 7.926651480 | 5.035156190  |
| H  | -4.784559250 | 5.205256810 | 5.041652220  |
| H  | 2.183301920  | 7.879723160 | 5.172312860  |
| O  | 3.348108990  | 1.620249650 | 5.043896520  |
| O  | -2.639952600 | 3.851362580 | 5.030257340  |
| H  | -2.530397790 | 9.109598090 | 5.041642470  |
| O  | -0.339727920 | 3.743213780 | 6.421646110  |
| O  | 2.285877010  | 3.696219050 | 6.425506280  |
| O  | 0.998201820  | 5.985403890 | 6.433797480  |
| H  | -2.311891910 | 2.564890070 | 7.242268700  |
| H  | 4.296973550  | 2.564890070 | 7.242268700  |
| H  | 0.992590820  | 8.288372260 | 7.242267980  |
| Si | 0.957415350  | 4.473448380 | -1.123814460 |
| Si | -1.185596690 | 3.218531240 | 0.757232360  |
| Si | 3.146990820  | 3.228884270 | 0.722181560  |

|    |              |              |              |
|----|--------------|--------------|--------------|
| Si | 0.992590820  | 6.960484270  | 0.722181560  |
| Si | -0.535626450 | 0.327052960  | 1.346634780  |
| Si | -1.841209180 | 7.909584270  | 1.315481560  |
| Si | 2.543545650  | 0.280710730  | 1.287997770  |
| Si | -3.400709180 | 5.208484270  | 1.315481560  |
| Si | 0.983626860  | 4.452920340  | 2.621482690  |
| Si | 0.986982690  | 4.474213970  | 5.863026690  |
| Si | -0.498159940 | 0.303896570  | 4.575675740  |
| Si | -1.840909180 | 7.910084270  | 4.544981560  |
| Si | 2.563054750  | 0.300241230  | 4.529547190  |
| Si | -3.401009180 | 5.207984270  | 4.544981560  |
| Si | -1.674509180 | 2.932884270  | 5.969781560  |
| Si | 3.659590820  | 2.932884270  | 5.969781560  |
| Si | 0.992590820  | 7.552384270  | 5.969781560  |
| O  | 0.345772050  | -0.690614700 | -3.427258670 |
| O  | 0.815483460  | 1.196088040  | -2.478616510 |
| O  | -0.608051970 | -0.174355580 | -1.601448880 |
| N  | 0.216856980  | 0.165951930  | -2.499723320 |
| H  | -2.207110900 | -0.355266500 | -4.696463710 |
| O  | -2.416201510 | -0.406351980 | -3.745088870 |
| H  | -3.362179650 | -0.592369210 | -3.687837520 |
| O  | -3.077218210 | -1.393080690 | -1.296661110 |
| H  | -2.809541110 | -0.609922940 | -0.788701010 |
| H  | -3.348126380 | -2.043616040 | -0.620745450 |
| Yb | -1.275199950 | -2.146229440 | -2.628199800 |
| O  | -3.169914850 | -2.969158060 | -3.786090330 |
| N  | -3.400800780 | -3.944606930 | -3.013711130 |
| O  | -2.582064230 | -4.038429350 | -2.045452270 |
| O  | -4.305450470 | -4.701903490 | -3.169820260 |
| O  | -1.034729760 | -6.280483690 | -2.749991400 |
| H  | -1.703125880 | -5.801809510 | -2.241456440 |
| H  | -0.292588470 | -6.312090300 | -2.130660680 |

bulk-T2-Yb:

|   |              |              |              |
|---|--------------|--------------|--------------|
| H | -2.644670610 | -8.638905840 | 0.716541040  |
| H | -4.884442880 | -4.759450680 | 0.716539880  |
| H | -2.643705180 | -8.654922980 | 4.974496320  |
| H | -4.897870170 | -4.750615940 | 4.974508600  |
| O | 2.224960900  | -3.298885240 | -4.950130530 |
| O | -0.433971430 | -3.160957140 | -4.902707840 |
| O | 0.792297610  | -5.539547640 | -4.950255670 |
| O | 3.196116750  | -1.146760910 | -6.238450390 |
| H | -2.613399560 | -3.382605520 | -6.269138490 |
| H | 2.075253960  | -7.360541000 | -6.269138600 |
| H | -0.316694050 | -7.360541000 | -6.269138600 |
| O | -1.462161040 | -1.149870170 | -6.289554580 |
| H | 4.371859470  | -3.382605520 | -6.269138490 |
| O | 2.191960660  | -3.176248520 | -7.619393580 |
| O | -0.464432660 | -3.243072130 | -7.603353130 |
| O | 0.914670450  | -5.565646550 | -7.620990820 |
| H | 0.879279950  | -4.018086130 | -9.603162080 |

|    |              |              |              |
|----|--------------|--------------|--------------|
| Si | 0.876747050  | -4.013838590 | -4.383723250 |
| Si | 3.033679950  | -2.774206130 | -6.264062080 |
| Si | -1.275220050 | -2.774206130 | -6.264062080 |
| Si | 0.879279950  | -6.505836130 | -6.264062080 |
| Si | 0.879279950  | -4.018086130 | -8.133162080 |
| O  | 0.909937930  | -4.145338920 | -2.801389930 |
| O  | 2.318062500  | -3.527927200 | -0.615552320 |
| O  | -0.289484630 | -3.037118730 | -0.723296720 |
| O  | 0.657079130  | -5.594730650 | -0.688617690 |
| O  | 2.934534760  | -1.154211580 | 0.418303580  |
| O  | -2.773409900 | -3.476124410 | 0.561935330  |
| H  | 2.075253960  | -7.360541000 | 0.660114440  |
| O  | -0.392077200 | -7.526693460 | 0.770807260  |
| O  | -1.301245460 | -1.008878100 | 0.342584060  |
| H  | 4.371859470  | -3.382605520 | 0.660114340  |
| O  | 2.269259100  | -3.144132300 | 2.066554850  |
| O  | -0.387104890 | -3.139171420 | 2.204918590  |
| O  | 0.932743210  | -5.476800380 | 1.943754620  |
| O  | 1.066486340  | -4.133463180 | 4.201545550  |
| O  | -2.030039320 | -7.489264300 | 2.865723760  |
| O  | -3.534119570 | -4.746219520 | 2.862038170  |
| O  | -2.687929460 | -6.089229080 | 0.721154070  |
| O  | -2.690386970 | -6.074712270 | 5.017080870  |
| O  | 3.120008250  | -1.154186600 | 5.046455430  |
| O  | -2.780316300 | -3.370312440 | 4.965125150  |
| H  | 2.069979590  | -7.425105410 | 5.105176900  |
| O  | -0.403853480 | -7.459735590 | 4.956733290  |
| O  | -1.337389920 | -1.103257680 | 5.170829400  |
| H  | 4.425163190  | -3.345748030 | 5.105179830  |
| O  | 2.199237510  | -3.264228250 | 6.421303580  |
| O  | -0.448040840 | -3.320639220 | 6.284199570  |
| O  | 0.884425750  | -5.549319140 | 6.429034820  |
| H  | 4.183656750  | -2.110220670 | 7.175113210  |
| H  | -2.425196840 | -2.110220670 | 7.175113210  |
| H  | 0.879279950  | -7.833714610 | 7.175112490  |
| Si | 0.891802620  | -4.057511180 | -1.199378210 |
| Si | 3.033679950  | -2.774206130 | 0.655037920  |
| Al | -1.228944830 | -2.738622480 | 0.759745750  |
| Si | 0.879279950  | -6.505836130 | 0.655037920  |
| Si | -1.954520050 | -7.454936130 | 1.248337920  |
| Si | -3.514020050 | -4.753786130 | 1.248337920  |
| Si | 0.942990820  | -3.968764640 | 2.597698400  |
| Si | 0.916816730  | -4.050446750 | 5.819304060  |
| Si | -1.954220050 | -7.455406130 | 4.477837920  |
| Si | -3.514320050 | -4.753316130 | 4.477837920  |
| Si | 3.546279950  | -2.478266130 | 5.902637920  |
| Si | -1.787820050 | -2.478266130 | 5.902637920  |
| Si | 0.879279950  | -7.097706130 | 5.902637920  |
| O  | -0.465331320 | 3.550143190  | -4.922241710 |
| O  | 2.199679200  | 3.551812910  | -4.932715210 |
| O  | 0.876373340  | 5.864966330  | -4.913801780 |

|    |              |              |              |
|----|--------------|--------------|--------------|
| O  | -1.449207610 | 1.448639660  | -6.201809780 |
| H  | 4.371876540  | 3.691555700  | -6.269138560 |
| H  | -0.316711200 | 7.669474730  | -6.269138670 |
| H  | 2.075271110  | 7.669474730  | -6.269138670 |
| O  | 3.203194140  | 1.462419970  | -6.257796730 |
| H  | -2.613416640 | 3.691555700  | -6.269138560 |
| O  | -0.437692650 | 3.489894970  | -7.610346900 |
| O  | 2.215816200  | 3.537238680  | -7.612755440 |
| O  | 0.854061220  | 5.867533640  | -7.607762030 |
| H  | 0.879279950  | 4.327093870  | -9.603162080 |
| H  | 2.492359410  | 0.154493870  | -8.326385300 |
| H  | -0.733799510 | 0.154493870  | -8.326385300 |
| O  | 0.872940460  | 0.164735050  | -6.305074880 |
| Si | 0.872960210  | 4.321631350  | -4.384392440 |
| Si | -1.275220050 | 3.083193870  | -6.264062080 |
| Si | 3.033679950  | 3.083193870  | -6.264062080 |
| Si | 0.879279950  | 6.814793870  | -6.264062080 |
| Si | 2.438779950  | 0.154493870  | -6.857362080 |
| Si | -0.680220050 | 0.154493870  | -6.857362080 |
| Si | 0.879279950  | 4.327093870  | -8.133162080 |
| O  | 0.835888890  | 4.280458830  | -2.784517730 |
| O  | -0.442710230 | 3.530719220  | -0.625338650 |
| O  | 2.226064140  | 3.745877410  | -0.608044070 |
| O  | 0.732666760  | 5.935049620  | -0.724168360 |
| O  | -1.469606980 | 1.523570510  | 0.683164470  |
| H  | 4.371876540  | 3.691555700  | 0.660114400  |
| O  | -0.398452910 | 7.822891970  | 0.753963150  |
| H  | -4.884443080 | 5.068404130  | 0.716539800  |
| H  | 2.075271110  | 7.669474730  | 0.660114520  |
| O  | 3.124630280  | 1.467234460  | 0.483889680  |
| O  | -2.772903450 | 3.727897850  | 0.660352020  |
| H  | -2.644680870 | 8.947854040  | 0.716533130  |
| O  | -0.477532840 | 3.584393280  | 2.079867220  |
| O  | 2.201001960  | 3.433619580  | 2.046994930  |
| O  | 0.942847400  | 5.803582200  | 1.953333640  |
| O  | 0.917622860  | 4.361011230  | 4.185849770  |
| O  | -1.298145300 | -0.003995520 | 2.827640320  |
| O  | -2.026435550 | 7.792301480  | 2.862104350  |
| O  | 3.038251870  | 0.111161120  | 2.759968690  |
| O  | -3.539861720 | 5.061113390  | 2.859192050  |
| O  | 0.846982330  | 0.343641390  | 1.347053910  |
| O  | -2.650723280 | 6.366787530  | 0.720543360  |
| O  | 0.891200860  | 0.168231430  | 4.384106640  |
| O  | -2.692103390 | 6.387358790  | 5.009989590  |
| O  | -1.316242840 | 1.520663980  | 4.993732810  |
| H  | 4.425143970  | 3.654711270  | 5.105197270  |
| O  | -0.402007980 | 7.773398300  | 4.951870770  |
| H  | -4.897870120 | 5.059566410  | 4.974508580  |
| H  | 2.069991050  | 7.734032760  | 5.105169220  |
| O  | 3.124618250  | 1.487837860  | 5.003932190  |
| O  | -2.771838250 | 3.704155320  | 4.982578460  |

|    |              |              |              |
|----|--------------|--------------|--------------|
| H  | -2.643708660 | 8.963907690  | 4.974498830  |
| O  | -0.460814200 | 3.617994650  | 6.363469060  |
| O  | 2.192827430  | 3.581868510  | 6.387538410  |
| O  | 0.876969880  | 5.848990490  | 6.388292180  |
| H  | -2.425202780 | 2.419199670  | 7.175125060  |
| H  | 4.183662680  | 2.419199670  | 7.175125060  |
| H  | 0.879279950  | 8.142681860  | 7.175124340  |
| Si | 0.847395510  | 4.374125100  | -1.184472940 |
| Si | -1.270721430 | 3.127268280  | 0.730482340  |
| Si | 3.033679950  | 3.083193870  | 0.655037920  |
| Si | 0.879279950  | 6.814793870  | 0.655037920  |
| Si | -0.769003940 | 0.185650370  | 1.307123300  |
| Si | -1.954520050 | 7.763893870  | 1.248337920  |
| Si | 2.465481680  | 0.176976080  | 1.234312270  |
| Si | -3.514020050 | 5.062793870  | 1.248337920  |
| Si | 0.916638140  | 4.294871110  | 2.581556930  |
| Si | 0.880927950  | 4.335547360  | 5.823248270  |
| Si | -0.739005530 | 0.146009360  | 4.354199470  |
| Si | -1.954220050 | 7.764393870  | 4.477837920  |
| Si | 2.523088890  | 0.151857680  | 4.307518930  |
| Si | -3.514320050 | 5.062293870  | 4.477837920  |
| Si | -1.787820050 | 2.787193870  | 5.902637920  |
| Si | 3.546279950  | 2.787193870  | 5.902637920  |
| Si | 0.879279950  | 7.406693870  | 5.902637920  |
| O  | 1.075632860  | -1.449629900 | -2.730038740 |
| O  | 2.616962180  | 0.033600860  | -2.437041590 |
| O  | -2.957120340 | -0.989148270 | -3.547811710 |
| O  | -3.455822320 | -0.930312940 | -1.472836090 |
| O  | 0.726581760  | 0.174247630  | -1.400456910 |
| Yb | -1.158894400 | -1.140797590 | -2.015499310 |
| N  | 1.531957850  | -0.395417610 | -2.193740150 |
| O  | -5.000891240 | -0.619091170 | -2.950455550 |
| N  | -3.860596520 | -0.832166350 | -2.665624690 |
| H  | -2.977601790 | -3.295799950 | -2.969487910 |
| O  | -2.217053060 | -3.303173970 | -2.377181000 |
| H  | -2.532975150 | -3.626304160 | -1.511634920 |
| O  | -0.537774040 | 0.193288420  | -3.838226770 |
| O  | -1.901923570 | 1.109414500  | -1.910964190 |
| H  | -2.367062150 | 1.239135400  | -1.070290110 |
| H  | -1.166989070 | 1.740774740  | -1.888001400 |
| H  | 0.201855080  | 0.062663000  | -4.450826010 |
| H  | -1.253237270 | 0.630244440  | -4.323111440 |

bulk-T3-Yb:

|   |              |              |              |
|---|--------------|--------------|--------------|
| H | -2.461220600 | -8.741370290 | 0.717919320  |
| H | -4.700992870 | -4.861915130 | 0.717918160  |
| H | -2.460255170 | -8.757387430 | 4.975874600  |
| H | -4.714420160 | -4.853080390 | 4.975886880  |
| O | 2.461107860  | -3.393587270 | -4.906758510 |
| O | -0.182481990 | -3.336714970 | -4.986918280 |
| O | 1.076556380  | -5.685826680 | -4.896992760 |

|    |              |              |              |
|----|--------------|--------------|--------------|
| O  | 3.393007010  | -1.252363910 | -6.237812560 |
| H  | -2.429949550 | -3.485069970 | -6.267760210 |
| H  | 2.258703970  | -7.463005450 | -6.267760320 |
| H  | -0.133244040 | -7.463005450 | -6.267760320 |
| O  | -1.274147710 | -1.254282530 | -6.265663080 |
| H  | 4.555309480  | -3.485069970 | -6.267760210 |
| O  | 2.383862000  | -3.307124620 | -7.604375380 |
| O  | -0.282388220 | -3.332084120 | -7.628415160 |
| O  | 1.079536760  | -5.664527830 | -7.605616850 |
| H  | 1.062729960  | -4.120550580 | -9.601783800 |
| Si | 1.097441690  | -4.131615810 | -4.401972770 |
| Si | 3.217129960  | -2.876670580 | -6.262683800 |
| Si | -1.091770040 | -2.876670580 | -6.262683800 |
| Si | 1.062729960  | -6.608300580 | -6.262683800 |
| Si | 1.062729960  | -4.120550580 | -8.131783800 |
| O  | 1.083583030  | -4.082858130 | -2.798608690 |
| O  | 2.229076480  | -3.344642010 | -0.564092400 |
| O  | -0.449171880 | -3.608132540 | -0.717181310 |
| O  | 1.095788270  | -5.762077670 | -0.749720210 |
| O  | 3.445361040  | -1.259738500 | 0.604292700  |
| O  | -2.644429820 | -3.417373520 | 0.816770550  |
| H  | 2.258703970  | -7.463005450 | 0.661492720  |
| O  | -0.225497750 | -7.609480160 | 0.716519920  |
| O  | -1.208105500 | -1.269113880 | 0.296152310  |
| H  | 4.555309480  | -3.485069970 | 0.661492620  |
| O  | 2.455755330  | -3.295106420 | 2.073278170  |
| O  | -0.205112120 | -3.160804200 | 1.908779010  |
| O  | 0.992456280  | -5.547586320 | 1.919754090  |
| O  | 0.955883730  | -4.080001150 | 4.125452280  |
| O  | -1.829887090 | -7.586236460 | 2.862044900  |
| O  | -3.409367280 | -4.915651360 | 2.862966540  |
| O  | -2.438241320 | -6.132417190 | 0.720660390  |
| O  | -2.501589560 | -6.177913870 | 5.015413650  |
| O  | 3.430587660  | -1.261311040 | 4.971786920  |
| O  | -2.568063920 | -3.493110680 | 4.944914400  |
| H  | 2.253429600  | -7.527569860 | 5.106555180  |
| O  | -0.223110990 | -7.584521520 | 4.966954050  |
| O  | -1.201016190 | -1.254108170 | 5.068151000  |
| H  | 4.608613200  | -3.448212480 | 5.106558110  |
| O  | 2.336370280  | -3.333670710 | 6.308700460  |
| O  | -0.292215370 | -3.419252970 | 6.377969740  |
| O  | 1.081353690  | -5.624245980 | 6.320304910  |
| H  | 4.367106760  | -2.212685120 | 7.176491490  |
| H  | -2.241746830 | -2.212685120 | 7.176491490  |
| H  | 1.062729960  | -7.936179060 | 7.176490770  |
| Si | 0.993917670  | -4.201511180 | -1.210631440 |
| Si | 3.217129960  | -2.876670580 | 0.656416200  |
| Si | -1.118685660 | -2.869860240 | 0.572222050  |
| Si | 1.062729960  | -6.608300580 | 0.656416200  |
| Si | -1.771070040 | -7.557400580 | 1.249716200  |
| Si | -3.330570040 | -4.856250580 | 1.249716200  |



|    |              |              |              |
|----|--------------|--------------|--------------|
| Si | 1.057351730  | -4.020705330 | 2.516046290  |
| Si | 1.029834940  | -4.109468340 | 5.760904490  |
| Si | -1.770770040 | -7.557870580 | 4.479216200  |
| Si | -3.330870040 | -4.855780580 | 4.479216200  |
| Si | 3.729729960  | -2.580730580 | 5.904016200  |
| Si | -1.604370040 | -2.580730580 | 5.904016200  |
| Si | 1.062729960  | -7.200170580 | 5.904016200  |
| O  | -0.256503330 | 3.484991770  | -4.948781590 |
| O  | 2.412241440  | 3.468101380  | -4.923134540 |
| O  | 1.083116140  | 5.787013690  | -4.901280750 |
| O  | -1.247849360 | 1.359113090  | -6.241316030 |
| H  | 4.555326550  | 3.589091250  | -6.267760280 |
| H  | -0.133261190 | 7.567010280  | -6.267760390 |
| H  | 2.258721120  | 7.567010280  | -6.267760390 |
| O  | 3.396118410  | 1.358077680  | -6.246225870 |
| H  | -2.429966630 | 3.589091250  | -6.267760280 |
| O  | -0.264637010 | 3.419077890  | -7.616880010 |
| O  | 2.398425190  | 3.429513760  | -7.610142510 |
| O  | 1.061790500  | 5.769753330  | -7.607279940 |
| H  | 1.062729960  | 4.224629420  | -9.601783800 |
| H  | 2.675809420  | 0.052029420  | -8.325007020 |
| H  | -0.550349500 | 0.052029420  | -8.325007020 |
| O  | 1.065912270  | 0.044855990  | -6.337852760 |
| Si | 1.071231210  | 4.233519480  | -4.399736540 |
| Si | -1.091770040 | 2.980729420  | -6.262683800 |
| Si | 3.217129960  | 2.980729420  | -6.262683800 |
| Si | 1.062729960  | 6.712329420  | -6.262683800 |
| Si | 2.622229960  | 0.052029420  | -6.855983800 |
| Si | -0.496770040 | 0.052029420  | -6.855983800 |
| Si | 1.062729960  | 4.224629420  | -8.131783800 |
| O  | 1.071885550  | 4.210144950  | -2.798179500 |
| O  | -0.381270390 | 3.606741830  | -0.680665870 |
| O  | 2.290972740  | 3.406558840  | -0.623589080 |
| O  | 1.103119490  | 5.811473070  | -0.712888290 |
| O  | -1.359680730 | 1.340230930  | 0.383199240  |
| H  | 4.555326550  | 3.589091250  | 0.661492680  |
| O  | -0.233637270 | 7.707094670  | 0.688714730  |
| H  | -4.700993070 | 4.965939680  | 0.717918080  |
| H  | 2.258721120  | 7.567010280  | 0.661492800  |
| O  | 3.530737320  | 1.376292590  | 0.662031330  |
| O  | -2.656633170 | 3.563551140  | 0.680439340  |
| H  | -2.461230860 | 8.845389590  | 0.717911410  |
| O  | -0.292548170 | 3.291436550  | 1.962691190  |
| O  | 2.379851290  | 3.398539510  | 2.026537100  |
| O  | 0.956017120  | 5.672924300  | 1.942124080  |
| O  | 0.957854860  | 4.184552120  | 4.133641870  |
| O  | -0.527061050 | 0.022326150  | 2.869682680  |
| O  | -1.818005720 | 7.685590530  | 2.860881500  |
| O  | 2.627477990  | 0.032950760  | 2.797503470  |
| O  | -3.371081660 | 4.958301670  | 2.857435340  |
| O  | 1.187019320  | 0.171488980  | 0.540236730  |

|    |              |              |              |
|----|--------------|--------------|--------------|
| O  | -2.462383500 | 6.249565240  | 0.724102860  |
| O  | 1.110598240  | 0.056930780  | 4.992040850  |
| O  | -2.515793490 | 6.289121010  | 5.004206580  |
| O  | -1.191439750 | 1.384212100  | 5.030555610  |
| H  | 4.608593980  | 3.552246820  | 5.106575550  |
| O  | -0.226370640 | 7.684483490  | 4.970371720  |
| H  | -4.714420110 | 4.957101960  | 4.975886860  |
| H  | 2.253441060  | 7.631568310  | 5.106547500  |
| O  | 3.423564390  | 1.379127670  | 4.953254310  |
| O  | -2.578079070 | 3.606237260  | 4.969734610  |
| H  | -2.460258650 | 8.861443240  | 4.975877110  |
| O  | -0.294218680 | 3.524884750  | 6.385120240  |
| O  | 2.338126090  | 3.439271610  | 6.316616960  |
| O  | 1.080650350  | 5.729479310  | 6.323814410  |
| H  | -2.241752770 | 2.316735220  | 7.176503340  |
| H  | 4.367112690  | 2.316735220  | 7.176503340  |
| H  | 1.062729960  | 8.040217410  | 7.176502620  |
| Si | 1.023253220  | 4.256006660  | -1.207449770 |
| Si | -1.129747400 | 2.938737820  | 0.596054250  |
| Si | 3.217129960  | 2.980729420  | 0.656416200  |
| Si | 1.062729960  | 6.712329420  | 0.656416200  |
| Al | -0.426640220 | 0.045160170  | 1.186445590  |
| Si | -1.771070040 | 7.661429420  | 1.249716200  |
| Si | 2.683206760  | 0.073375390  | 1.170335160  |
| Si | -3.330570040 | 4.960329420  | 1.249716200  |
| Si | 1.009657520  | 4.138968230  | 2.522995100  |
| Si | 1.030070930  | 4.212190440  | 5.770070100  |
| Si | -0.446633870 | 0.051981680  | 4.464670120  |
| Si | -1.770770040 | 7.661929420  | 4.479216200  |
| Si | 2.645545090  | 0.051836130  | 4.425312980  |
| Si | -3.330870040 | 4.959829420  | 4.479216200  |
| Si | -1.604370040 | 2.684729420  | 5.904016200  |
| Si | 3.729729960  | 2.684729420  | 5.904016200  |
| Si | 1.062729960  | 7.304229420  | 5.904016200  |
| H  | -3.641187640 | 2.409266630  | -0.169882810 |
| O  | -3.998104730 | 0.265499690  | -3.033085000 |
| O  | -2.279929440 | 1.531263890  | -3.137627240 |
| N  | -3.380970070 | 1.183181680  | -3.656832760 |
| O  | -3.821811720 | 1.696774080  | -4.641887930 |
| O  | -3.964507020 | 1.677028430  | -0.734686260 |
| H  | -4.489409710 | 2.066616150  | -1.442161120 |
| Yb | -2.349899440 | 0.017805520  | -1.366531830 |
| H  | -4.750581340 | -0.544983330 | 0.260651570  |
| H  | -3.700202470 | -1.669658820 | 0.538228030  |
| O  | -3.810921100 | -0.714015880 | 0.388620230  |
| O  | -0.070389870 | 0.401227330  | -1.862382140 |
| H  | 0.230886300  | -0.075555710 | -2.646165650 |
| H  | 0.623700770  | 0.331238590  | -1.172050770 |
| O  | -3.123152810 | -2.127586600 | -1.748447150 |
| O  | -1.658982940 | -1.396339600 | -3.098492630 |
| N  | -2.479303530 | -2.317447990 | -2.823033340 |

O -2.647646900 -3.278554820 -3.508052080

surf-silanol-Yb:

O -2.392735430 2.353853310 1.706879580  
O -5.047115890 2.318959800 1.748153780  
O -3.763224320 0.037603570 1.534287370  
O 2.401803830 -3.528178390 1.543357470  
O 5.031825760 -3.509844970 1.747091580  
O 3.700897950 -1.207476330 1.727004250  
O -1.273979680 4.288081410 0.308087360  
H -7.148838840 2.071000840 0.319903970  
O -2.318282320 -1.966213820 0.511747790  
H 1.274234080 -5.444011590 0.319903970  
O 7.235829490 -3.375613400 0.252298350  
O 2.212668980 0.677149550 0.592106550  
H -4.852183620 -1.906922680 0.319903970  
O -6.039899550 4.291630180 0.257747890  
O -0.026181670 1.965618840 0.585364640  
O 4.848486160 0.741967360 0.297454500  
H 5.867544510 -5.444011600 0.319903970  
O -0.049247850 -3.279873880 0.508664000  
O -2.202736870 2.100707570 -0.977245980  
O -4.867982160 2.165809740 -0.929880610  
O -3.557895990 -0.205554460 -1.099150080  
O 2.096359490 -3.472321120 -1.100487960  
O 4.803086670 -3.426032340 -0.930596220  
O 3.407456090 -1.146103850 -0.946977740  
O -3.576171490 1.457260910 -3.140254070  
O 3.542084170 -2.643178790 -3.138388890  
O -1.047582320 -2.376227480 -1.776320140  
O 0.964577680 1.124359230 -1.749145880  
O -0.046239390 -0.644270210 -0.034992410  
O -0.030846830 -0.631341700 -3.517305080  
H -1.300990380 4.170251960 -4.125172570  
O -2.305513220 -1.932908850 -4.045471340  
H 1.215678360 -5.471759850 -4.125172570  
O 2.246162970 0.675900750 -4.012942290  
H -4.846936450 -1.971507560 -4.125172570  
O -0.043933020 1.992238280 -4.014524730  
H 4.761625080 0.669999290 -4.125172570  
O -0.026793670 -3.253843710 -4.045496780  
O -2.354067640 2.196471620 -5.381309010  
H -4.852111370 2.125986000 -5.277081150  
O -3.704466560 -0.070592380 -5.365125090  
O 2.289593350 -3.531921120 -5.365832330  
H 4.766799640 -3.427494790 -5.277081260  
O 3.572034950 -1.228281430 -5.385282350  
H -0.351785540 3.343332470 -6.195063450  
H -3.656201150 -2.380083580 -6.195063300  
H 0.266473490 -4.644840840 -6.195063300  
H 3.570889380 1.078575050 -6.195063450

|    |              |              |              |
|----|--------------|--------------|--------------|
| Si | -3.726954410 | 1.494219260  | 2.285588210  |
| Si | 3.664314080  | -2.766766770 | 2.264688900  |
| Si | -1.497022890 | 2.675701300  | 0.380542610  |
| Si | -5.810661570 | 2.679405490  | 0.324941130  |
| Si | -3.656201160 | -1.052229410 | 0.324941130  |
| Si | 1.416428930  | -3.980913760 | 0.324941130  |
| Si | 5.725349770  | -3.980913760 | 0.324941130  |
| Si | 3.562168850  | -0.246056190 | 0.427603810  |
| Si | -0.853883670 | -2.056207580 | -0.193024160 |
| Si | 0.780171770  | 0.740993590  | -0.184646660 |
| Si | -3.570946200 | 1.369922480  | -1.534912270 |
| Si | 3.469137700  | -2.683028920 | -1.526354170 |
| Si | -3.656201160 | 1.435526700  | -4.773132010 |
| Si | 3.570889580  | -2.737035340 | -4.773132010 |
| Si | -0.844313050 | -2.039723710 | -3.353226130 |
| Si | 0.778843060  | 0.772112420  | -3.337085150 |
| Si | -0.989168270 | 2.975339840  | -4.922575860 |
| Si | -3.656201150 | -1.644097360 | -4.922575860 |
| Si | 0.903856250  | -4.276847730 | -4.922575860 |
| Si | 3.570889780  | 0.342589100  | -4.922575860 |
| O  | 3.549562000  | -2.806431430 | 3.883118090  |
| O  | -3.445922680 | 1.389597430  | 3.849705940  |
| H  | -5.896008390 | 6.797724830  | 0.263476960  |
| H  | -1.416394000 | 6.797724870  | 0.263476980  |
| H  | -2.043135210 | 5.608089840  | -1.737391290 |
| H  | -5.269267100 | 5.608089840  | -1.737391290 |
| O  | -3.652442010 | 5.544035420  | 0.264334090  |
| Si | -2.096695470 | 5.608089840  | -0.268367360 |
| Si | -5.215706840 | 5.608089840  | -0.268367360 |
| H  | 7.094785190  | 1.883793280  | 0.263476980  |
| H  | 9.334592350  | -1.995666600 | 0.263476960  |
| H  | 6.377901630  | 0.746201950  | -1.737391290 |
| H  | 7.990967580  | -2.047710220 | -1.737391290 |
| O  | 7.138593250  | -0.675799850 | 0.253534980  |
| Si | 6.404681760  | 0.699817410  | -0.268367360 |
| Si | 7.964187450  | -2.001325680 | -0.268367360 |
| H  | 2.740546710  | -2.375500520 | 4.198704190  |
| H  | 0.469127740  | 2.230881410  | 2.284823960  |
| Yb | -1.398385250 | 1.556584180  | 4.543001440  |
| H  | -2.274354460 | 3.886347860  | 3.219912000  |
| H  | 1.235318020  | 2.395150700  | 3.645674830  |
| O  | -0.016941860 | 2.926229870  | 5.874489570  |
| O  | -1.660432150 | 1.937289120  | 6.806292520  |
| N  | -0.659074780 | 2.711165410  | 6.946253830  |
| O  | 0.903531570  | -1.495652370 | 3.472489120  |
| O  | 0.424888480  | 0.089817170  | 4.858688280  |
| O  | -0.761961910 | -0.174643260 | 3.105164840  |
| N  | 0.214978270  | -0.566477230 | 3.804217930  |
| O  | -0.357576780 | 3.190501240  | 7.992268220  |
| O  | 0.370203100  | 2.479199690  | 3.226445170  |
| O  | -2.427789610 | -0.366445130 | 5.506570410  |

|   |              |              |             |
|---|--------------|--------------|-------------|
| O | -1.943706870 | 3.825031220  | 4.129121960 |
| H | -3.282589390 | -0.169149660 | 5.081501050 |
| H | -2.559781770 | -0.251069860 | 6.456280760 |
| H | -1.118101740 | 4.327222040  | 4.148777080 |

surf-T2-Yb:

|   |              |              |              |
|---|--------------|--------------|--------------|
| O | -2.458263220 | 1.974888680  | 2.200467340  |
| O | -5.128662050 | 2.264943880  | 1.898481800  |
| O | -4.035150000 | -0.146095990 | 1.777809510  |
| O | 2.216383890  | -3.663253310 | 1.752112880  |
| O | 4.857912300  | -3.589353050 | 1.901362410  |
| O | 3.455013040  | -1.327564310 | 1.997248540  |
| O | -1.454142380 | 4.210019170  | 0.611084360  |
| H | -7.321411160 | 1.934941900  | 0.511358180  |
| O | -2.381785280 | -1.924530770 | 0.802090630  |
| H | 1.101661760  | -5.580070530 | 0.511358180  |
| O | 7.062191080  | -3.510573660 | 0.441284410  |
| O | 2.124160960  | 0.581867100  | 0.725941610  |
| H | -5.024755940 | -2.042981620 | 0.511358180  |
| O | -6.221428690 | 4.152356220  | 0.434433140  |
| O | -0.207307570 | 1.591717980  | 0.995168220  |
| O | 4.706772240  | 0.575785240  | 0.557816440  |
| H | 5.694972190  | -5.580070540 | 0.511358180  |
| O | -0.242402130 | -3.447211530 | 0.687856360  |
| O | -2.465118150 | 1.913808470  | -0.763623220 |
| O | -5.130893850 | 1.959465070  | -0.765469590 |
| O | -3.788422510 | -0.381229670 | -0.911453320 |
| O | 1.927313890  | -3.602620670 | -0.901403030 |
| O | 4.639011130  | -3.623415880 | -0.771989760 |
| O | 3.311381650  | -1.325602650 | -0.716266990 |
| O | -3.796973750 | 1.267915730  | -2.957463510 |
| O | 3.363620780  | -2.772317440 | -2.946747210 |
| O | -1.343331650 | -2.576547050 | -1.580019270 |
| O | 0.776879660  | 1.117404950  | -1.527269840 |
| O | -0.023944230 | -0.890512280 | -0.028000500 |
| O | -0.189975280 | -0.771325560 | -3.183343940 |
| H | -1.473562700 | 4.034193020  | -3.933718360 |
| O | -2.450243630 | -2.055182040 | -3.889655890 |
| H | 1.043106040  | -5.607818790 | -3.933718360 |
| O | 2.081236470  | 0.511149620  | -3.782648520 |
| H | -5.019508770 | -2.107566500 | -3.933718360 |
| O | -0.208123600 | 1.828634770  | -3.856703890 |
| H | 4.589052760  | 0.533940350  | -3.933718360 |
| O | -0.170206010 | -3.375110190 | -3.829363250 |
| O | -2.528616160 | 2.066047570  | -5.181333710 |
| H | -5.024683690 | 1.989927060  | -5.085626940 |
| O | -3.872055590 | -0.208361050 | -5.188110430 |
| O | 2.121397060  | -3.674519190 | -5.175954720 |
| H | 4.594227320  | -3.563553730 | -5.085627050 |
| O | 3.402985780  | -1.364583300 | -5.196300940 |
| H | -0.524357860 | 3.207273530  | -6.003609240 |

|    |              |              |              |
|----|--------------|--------------|--------------|
| H  | -3.828773470 | -2.516142520 | -6.003609090 |
| H  | 0.093901170  | -4.780899780 | -6.003609090 |
| H  | 3.398317060  | 0.942516110  | -6.003609240 |
| Si | -3.946641100 | 1.323593590  | 2.504632000  |
| Si | 3.484753010  | -2.916805550 | 2.479048970  |
| Al | -1.701935970 | 2.492275070  | 0.651639340  |
| Si | -5.983233890 | 2.543346550  | 0.516395340  |
| Si | -3.828773480 | -1.188288350 | 0.516395340  |
| Si | 1.243856610  | -4.116972700 | 0.516395340  |
| Si | 5.552777450  | -4.116972700 | 0.516395340  |
| Si | 3.425518400  | -0.420630070 | 0.644231200  |
| Si | -0.993707650 | -2.198795910 | -0.036649080 |
| Si | 0.636275780  | 0.592353300  | 0.008377330  |
| Si | -3.788338400 | 1.211121940  | -1.347897690 |
| Si | 3.315039330  | -2.847956300 | -1.338165800 |
| Si | -3.828773480 | 1.299467760  | -4.581677800 |
| Si | 3.398317260  | -2.873094280 | -4.581677800 |
| Si | -1.023708920 | -2.179589570 | -3.136885640 |
| Si | 0.610510650  | 0.653711620  | -3.101459130 |
| Si | -1.161740590 | 2.839280900  | -4.731121650 |
| Si | -3.828773470 | -1.780156300 | -4.731121650 |
| Si | 0.731283930  | -4.412906670 | -4.731121650 |
| Si | 3.398317460  | 0.206530160  | -4.731121650 |
| O  | 3.519183680  | -3.056499850 | 4.091643060  |
| O  | -4.141263250 | 1.059806150  | 4.116042900  |
| H  | -6.068580710 | 6.661665890  | 0.454931170  |
| H  | -1.588966320 | 6.661665930  | 0.454931190  |
| H  | -2.215707530 | 5.472030900  | -1.545937080 |
| H  | -5.441839420 | 5.472030900  | -1.545937080 |
| O  | -3.832141390 | 5.419910860  | 0.443277180  |
| Si | -2.269267790 | 5.472030900  | -0.076913150 |
| Si | -5.388279160 | 5.472030900  | -0.076913150 |
| H  | 6.922212870  | 1.747734340  | 0.454931190  |
| H  | 9.162020030  | -2.131725540 | 0.454931170  |
| H  | 6.205329310  | 0.610143010  | -1.545937080 |
| H  | 7.818395260  | -2.183769160 | -1.545937080 |
| O  | 6.975713240  | -0.807414620 | 0.440664610  |
| Si | 6.232109440  | 0.563758470  | -0.076913150 |
| Si | 7.791615130  | -2.137384620 | -0.076913150 |
| H  | -3.673786880 | 1.682667100  | 4.703595310  |
| H  | 2.691840380  | -2.807157940 | 4.530379710  |
| Yb | -0.477260420 | 1.441347970  | 3.397109420  |
| H  | -0.754592770 | 4.189651160  | 2.172767720  |
| H  | 2.375079960  | 1.624626690  | 3.734785040  |
| O  | 0.153540820  | 2.574443210  | 5.349991180  |
| O  | -1.906493050 | 2.134144980  | 5.071091530  |
| N  | -1.014700820 | 2.701747980  | 5.797019980  |
| O  | 0.991506840  | -2.123187060 | 4.222282110  |
| O  | 0.711215870  | -0.059206660 | 4.785113320  |
| O  | 0.405264800  | -0.649882970 | 2.765041430  |
| N  | 0.720604030  | -0.984380340 | 3.941099620  |

|   |              |              |             |
|---|--------------|--------------|-------------|
| O | -1.287205560 | 3.289613050  | 6.792961600 |
| O | 1.792622640  | 1.974105090  | 3.047986390 |
| O | -1.924483360 | -0.434447710 | 3.809436750 |
| O | -0.384198930 | 3.769754430  | 2.987682730 |
| H | -2.054838220 | -1.086682460 | 3.105589420 |
| H | -2.811200730 | -0.216860980 | 4.161842950 |
| H | 0.540281230  | 4.041240180  | 3.048035290 |
| H | 2.076749850  | 1.565622290  | 2.200185460 |

surf-T3-Yb:

|   |              |              |              |
|---|--------------|--------------|--------------|
| O | -2.975308000 | 2.080596410  | 1.963837060  |
| O | -5.583548150 | 1.873634420  | 2.079292610  |
| O | -4.073615800 | -0.335973910 | 2.053246970  |
| O | 1.776322000  | -3.609202630 | 1.993772580  |
| O | 4.419708050  | -3.873721170 | 2.091821920  |
| O | 3.397073970  | -1.460854130 | 2.076438630  |
| O | -1.696474980 | 4.103394240  | 0.739198700  |
| H | -7.628806310 | 1.841616420  | 0.703514350  |
| O | -2.907935630 | -2.366982320 | 0.672447030  |
| H | 0.794266610  | -5.673396010 | 0.703514350  |
| O | 6.748908860  | -3.571946230 | 0.716337340  |
| O | 1.753741530  | 0.438884190  | 1.101911260  |
| H | -5.332151090 | -2.136307100 | 0.703514350  |
| O | -6.488803670 | 4.072047200  | 0.725483550  |
| O | -0.453795090 | 1.817505710  | 1.029287350  |
| O | 4.348868890  | 0.585176480  | 0.683411730  |
| H | 5.387577040  | -5.673396020 | 0.703514350  |
| O | -0.586789390 | -3.618582600 | 0.708614140  |
| O | -2.602344900 | 1.971705190  | -0.642848460 |
| O | -5.304245460 | 2.077514860  | -0.574332470 |
| O | -4.039479180 | -0.297924880 | -0.612731900 |
| O | 1.726944570  | -3.733823730 | -0.663324730 |
| O | 4.418913070  | -3.570720350 | -0.576226320 |
| O | 2.926710870  | -1.345716170 | -0.559764320 |
| O | -4.041339840 | 1.227485820  | -2.753574930 |
| O | 3.067477350  | -2.857338510 | -2.752272060 |
| O | -1.276908430 | -2.218725620 | -1.460177710 |
| O | 0.328331100  | 0.505377050  | -1.487219970 |
| O | -0.691171170 | -0.952138110 | 0.804046400  |
| O | -0.524470440 | -0.870609850 | -3.631919390 |
| H | -1.780957850 | 3.940867540  | -3.741562190 |
| O | -2.826730370 | -2.222852270 | -3.612769700 |
| H | 0.735710890  | -5.701144270 | -3.741562190 |
| O | 1.776561890  | 0.483383770  | -3.657471880 |
| H | -5.326903920 | -2.200891980 | -3.741562190 |
| O | -0.505071840 | 1.796183850  | -3.629575880 |
| H | 4.281657610  | 0.440614870  | -3.741562190 |
| O | -0.534854700 | -3.540981520 | -3.624508930 |
| O | -2.838715090 | 1.973848200  | -5.000184450 |
| H | -5.332078840 | 1.896601580  | -4.893470770 |
| O | -4.158587660 | -0.301640110 | -4.978291520 |

|    |               |              |              |
|----|---------------|--------------|--------------|
| O  | 1.799865480   | -3.744225100 | -4.974529240 |
| H  | 4.286832170   | -3.656879210 | -4.893470880 |
| O  | 3.108716710   | -1.459645460 | -4.999098520 |
| H  | -0.831753010  | 3.113948050  | -5.811453070 |
| H  | -4.136168620  | -2.609468000 | -5.811452920 |
| H  | -0.213493980  | -4.874225260 | -5.811452920 |
| H  | 3.090921910   | 0.849190630  | -5.811453070 |
| Si | -4.188826500  | 1.203305450  | 2.637542390  |
| Si | 3.154554920   | -2.991555640 | 2.655528650  |
| Si | -1.943819670  | 2.473147400  | 0.787306730  |
| Si | -6.290629040  | 2.450021070  | 0.708551510  |
| Si | -4.136168630  | -1.281613830 | 0.708551510  |
| Si | 0.936461460   | -4.210298180 | 0.708551510  |
| Si | 5.245382300   | -4.210298180 | 0.708551510  |
| Si | 3.087391050   | -0.480226220 | 0.825517140  |
| Si | -1.362571040  | -2.290419610 | 0.160110770  |
| Al | 0.217195070   | 0.396996260  | 0.186103290  |
| Si | -4.005209570  | 1.248926440  | -1.141338940 |
| Si | 3.038484730   | -2.889073890 | -1.142702830 |
| Si | -4.136168630  | 1.206142280  | -4.389521630 |
| Si | 3.090922110   | -2.966419760 | -4.389521630 |
| Si | -1.290762610  | -2.208503460 | -3.085396670 |
| Si | 0.257531000   | 0.469450790  | -3.085552760 |
| Si | -1.469135740  | 2.745955420  | -4.538965480 |
| Si | -4.136168620  | -1.873481780 | -4.538965480 |
| Si | 0.423888780   | -4.506232150 | -4.538965480 |
| Si | 3.090922310   | 0.113204680  | -4.538965480 |
| O  | 3.075869950   | -2.969251620 | 4.270946340  |
| O  | -4.119512110  | 1.215056390  | 4.251137020  |
| H  | -6.375975860  | 6.568340410  | 0.647087340  |
| H  | -1.896361470  | 6.568340450  | 0.647087360  |
| H  | -2.523102680  | 5.378705420  | -1.353780910 |
| H  | -5.749234570  | 5.378705420  | -1.353780910 |
| O  | -4.128082430  | 5.320282820  | 0.630607340  |
| Si | -2.576662940  | 5.378705420  | 0.115243020  |
| Si | -5.695674310  | 5.378705420  | 0.115243020  |
| H  | 6.614817720   | 1.654408860  | 0.647087360  |
| H  | 8.854624880   | -2.225051020 | 0.647087340  |
| H  | 5.897934160   | 0.516817530  | -1.353780910 |
| H  | 7.511000110   | -2.277094640 | -1.353780910 |
| O  | 6.641240920   | -0.904185600 | 0.635973770  |
| Si | 5.924714290   | 0.470432990  | 0.115243020  |
| Si | 7.484219980   | -2.230710100 | 0.115243020  |
| H  | -3.4211131120 | 1.728245310  | 4.691509680  |
| H  | 3.232226860   | -2.107978580 | 4.693229880  |
| H  | -0.007418150  | 4.316575890  | 1.886870820  |
| O  | 0.865114210   | 4.066007780  | 2.243330020  |
| H  | 1.527073900   | 4.280203050  | 1.573960050  |
| Yb | 0.982571130   | 1.809617900  | 2.926445500  |
| H  | 3.540117290   | 2.096558400  | 1.347658070  |
| O  | 1.877791990   | -0.072039410 | 3.995119980  |



|   |              |              |             |
|---|--------------|--------------|-------------|
| H | 3.669032750  | 2.760605850  | 2.724596350 |
| O | 2.956155510  | 1.716438490  | 4.381059250 |
| N | 2.866798870  | 0.472568540  | 4.553572430 |
| O | 3.085760880  | 2.719733420  | 1.950923870 |
| O | -0.597962280 | 0.088422260  | 3.212238570 |
| H | -0.264476130 | -0.564975670 | 3.841849420 |
| H | -0.842757750 | -0.417208980 | 2.397410460 |
| O | 3.668788120  | -0.164855680 | 5.182406450 |
| O | 0.241614900  | 1.928131740  | 5.145503590 |
| O | -0.971028380 | 2.878377660  | 3.687302410 |
| N | -0.890017180 | 2.392787270  | 4.844546360 |
| O | -1.829591570 | 2.352632760  | 5.594632210 |
